# Supplementary material
Source: publisher figshare collection journal article supplement (https://tandf.figshare.com/articles/dataset/_/9918716)
Supplement: Supplementary file 1 [file 1]

Archive with 3 entries (3 files):
- 3b. Supplementary material_Losses by region_Annex I.docx
- 3c. Supplementary material_Insurance losses_Africa_2013-2018.pdf
- 3d. Supplementary material_Insurance losses_Caribbean_2013-2018.pdf
