# Supplementary material
Source: publisher figshare collection journal article supplement (https://tandf.figshare.com/articles/dataset/_/9918716)
Supplement: Supplementary file 1 [file 1 › 3b. Supplementary material_Losses by region_Annex I.docx]

| Year | Event | Region | Affected countries | Overall losses (US$m, original values) | Insured losses (US$m, original values) |
| --- | --- | --- | --- | --- | --- |
| 2018 | Tropical storm Alberto | Caribbean | Cuba | 30 |  |
| 2017 | Hurricane Maria, flood | Caribbean | Puerto Rico, US Virgin Islands, Dominica, Guadeloupe, Dominican Republic, Martinique | 68600 | 29900 |
| 2017 | Hurricane Irma, storm surge, flood | Caribbean | US Virgin Islands, British Virgin Islands, Cuba, Saint Martin, Sint Maarten, Saint Barthelemy, Anguilla, Puerto Rico, Turks and Caicos Islands, Antigua and Barbuda, Bahamas, Bonaire, Sint Eustatius, Saba, Dominican Republic, Haiti, Saint Kitts and Nevis | 27600 | 13400 |
| 2016 | Hurricane Matthew, storm surge | Caribbean | Cuba, Haiti, Bahamas, Dominican Republic, Saint Lucia, Saint Vincent and the Grenadines | 4200 | 20 |
| 2015 | Tropical storm Erika, flash flood | Caribbean | Dominica, Puerto Rico, Dominican Republic, Haiti | 440 |  |
| 2015 | Hurricane Joaquin | Caribbean | Bahamas, Haiti | 80 | 14 |
| 2014 | Hurricane Gonzalo | Caribbean | Antigua and Barbuda, Sint Marteen | 15 |  |
|  |  |  | **TOTAL (Caribbean region)** | **100950** | **43334** |
| 2018 | Drought | Africa | South Africa | 500 |  |
| 2018 | Flood | Africa | Kenya | 350 |  |
| 2018 | Flood, flash flood, severe storm | Africa | Nigeria | 280 |  |
| 2018 | Tropical cyclone Ava, flood | Africa | Madagascar | 130 |  |
| 2018 | Tropical storm Fakir, landslide | Africa | Reunion | 20 |  |
| 2017 | Drought | Africa | Somalia, Ethopia, Kenya | 930 |  |
| 2017 | Flash flood, hail | Africa | South Africa | 320 | 140 |
| 2017 | Cyclone Enawo, flood | Africa | Madagascar | 200 |  |
| 2017 | Drought | Africa | South Africa | 200 |  |
| 2016 | Drought | Africa | Zimbabwe, Angola, Lesotho, Madagascar, Mozambique, Namibia, South Africa, Swaziland, Zambia | 500 |  |
| 2016 | Drought | Africa | Tunisia | 500 |  |
| 2016 | Flash flood, sever storm | Africa | South Africa | 150 | 50 |
| 2016 | Flood, flash flood | Africa | South Africa | 100 | 30 |
| 2016 | Flood | Africa | Zimbabwe | 100 |  |
| 2015 | Drought | Africa | South Africa | 1800 |  |
| 2015 | Drought | Africa | Ethiopia, Somalia | 500 |  |
| 2015 | Flood | Africa | Malawi, Mozambique, South Africa, Zimbabwe | 470 |  |
| 2015 | Flash flood | Africa | Ghana, Togo | 100 |  |
| 2015 | Hailstorm | Africa | South Africa | 75 |  |
| 2014 | Flood, flash flood | Africa | Marocco | 300 |  |
| 2014 | Cyclone Bejisa, storm surge | Africa | Reunion | 150 | 60 |
| 2014 | Flood | Africa | South Africa | 85 |  |
| 2014 | Flood, flash flood | Africa | South Africa | 45 |  |
| 2013 | Hailstorm, flash flood | Africa | South Africa, Swaziland | 300 | 160 |
| 2013 | Hailstorm | Africa | South Africa | 75 | 28 |
| 2013 | Flood, flash flood | Africa | South Africa | 60 | 17 |
| 2013 | Cyclone Dumile | Africa | Reunion | 45 | 5 |
| 2013 | Flood | Africa | South Africa, Angola, Botswana, Malawi, Mozambique, Zimbabwe, | 40 |  |
|  |  |  | **TOTAL (African region)** | **8325** | **490** |
| 2018 | Cyclone Gita | Pacific | Tonga, American Samoa, Fiji, Samoa, New Zealand | 200 | 30 |
| 2016 | Cyclone Winston | Pacific | Fiji | 600 | 120 |
| 2015 | Cyclone Pam | Pacific | Vanuatu, Tuvalu, Kiribati, Solomon Islands | 310 | 100 |
| 2014 | Cyclone Ian | Pacific | Tonga | 38 | 0 |
| 2014 | Flash flood | Pacific | Solomon Islands | 50 | 0 |
|  |  |  | **TOTAL (Pacific region)** | **1198** | **250** |

**Table 2: The costliest weather-related disasters each year from 2013-2018 by the regions with established regional insurance pools** Note: MunichRE publishes data for single events based on the five costliest events per year. As data from the Pacific is aggregated with data from Australia and Oceania, less costly events in the Pacific are overwritten by high losses in Australia as a developed nation. Only cyclones in the Caribbean are captured by the model. Accounted events in the models that were run with NatCatSERVICE have caused at least one fatality and/or produced normalised losses ≥ US$ 100k, 300k, 1m, or 3m (depending on the assigned World Bank income group of the affected country). Source: NatCatSERVICE, MunichRE

Sentence to insert in manuscript:
