# Supplementary material
Source: publisher figshare collection journal article supplement (https://tandf.figshare.com/articles/dataset/_/9918716)
Supplement: Supplementary file 1 [file 1 › 3c. Supplementary material_Insurance losses_Africa_2013-2018.pdf]

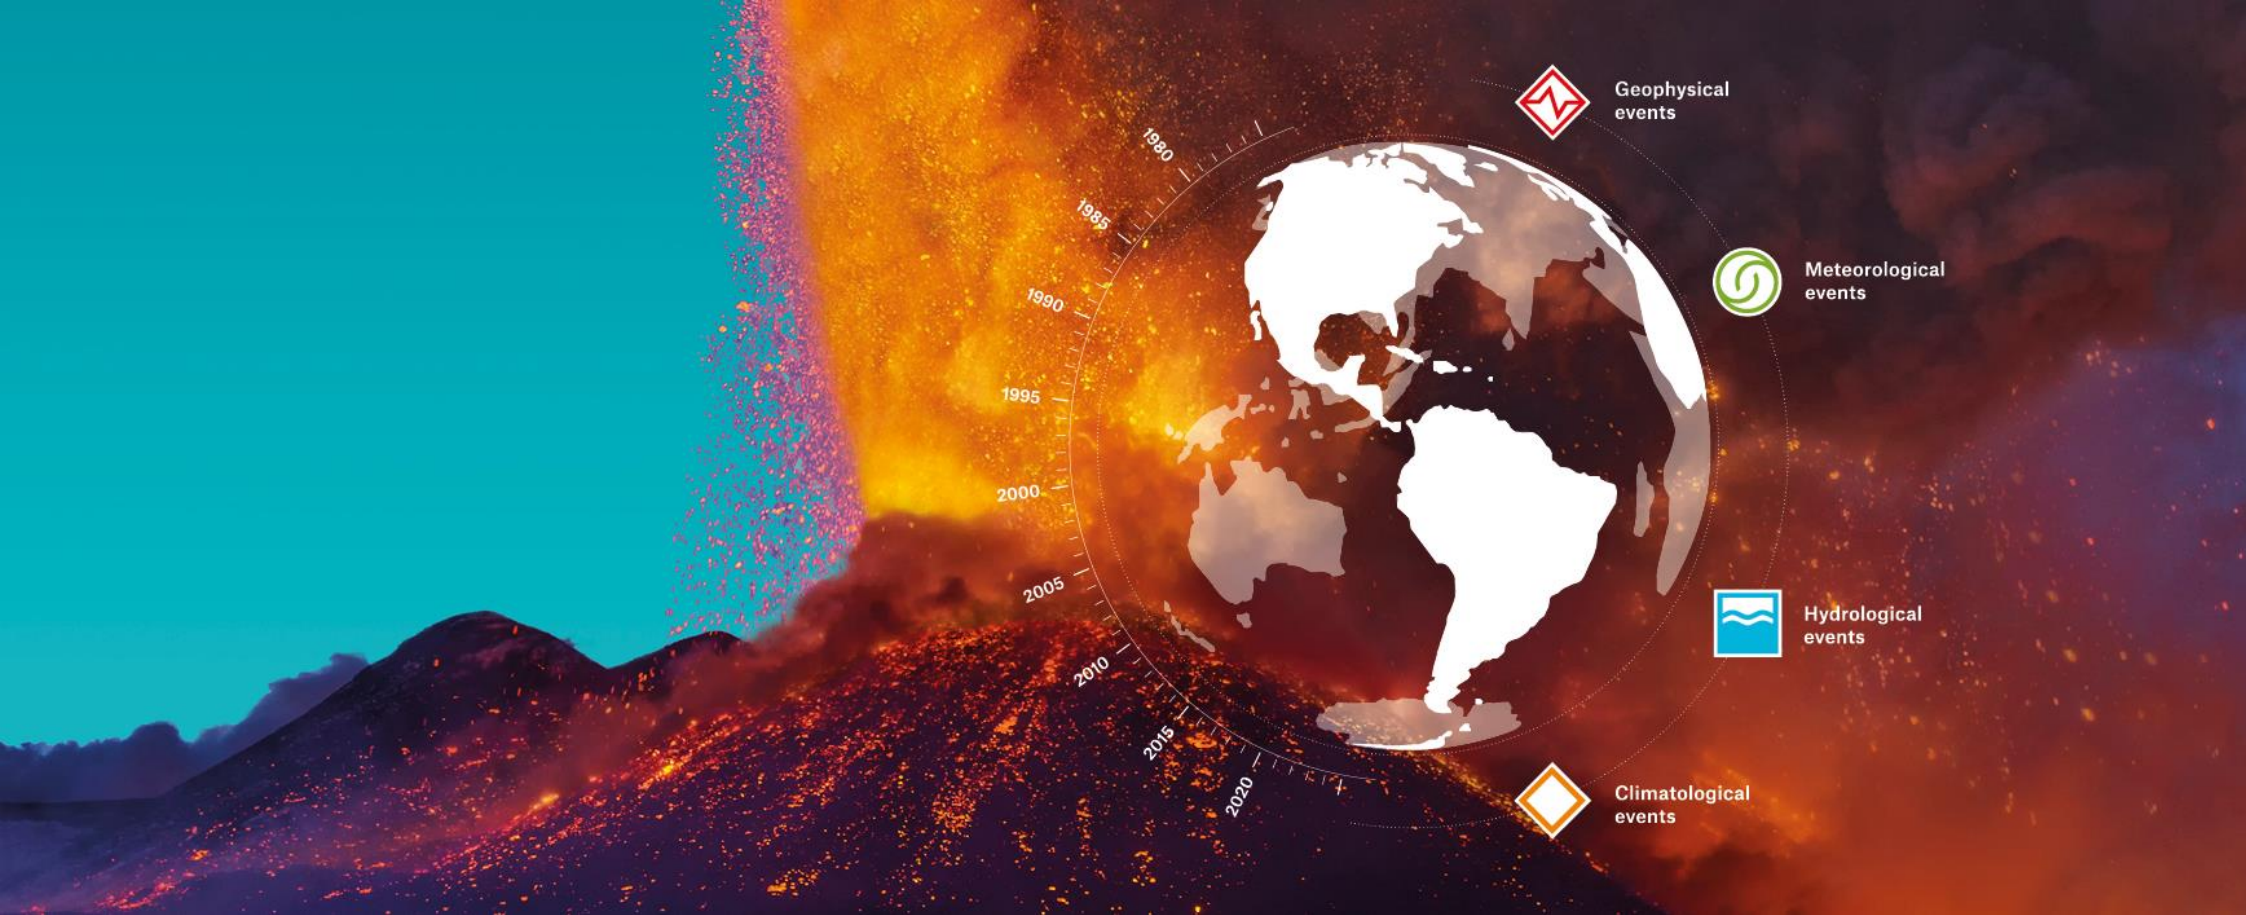

# NatCatSERVICE

## Relevant weather-related loss events in Africa 2013 – 2018

## Geographical overview

Relevant weather-related loss events  
in Africa 2013 – 2018

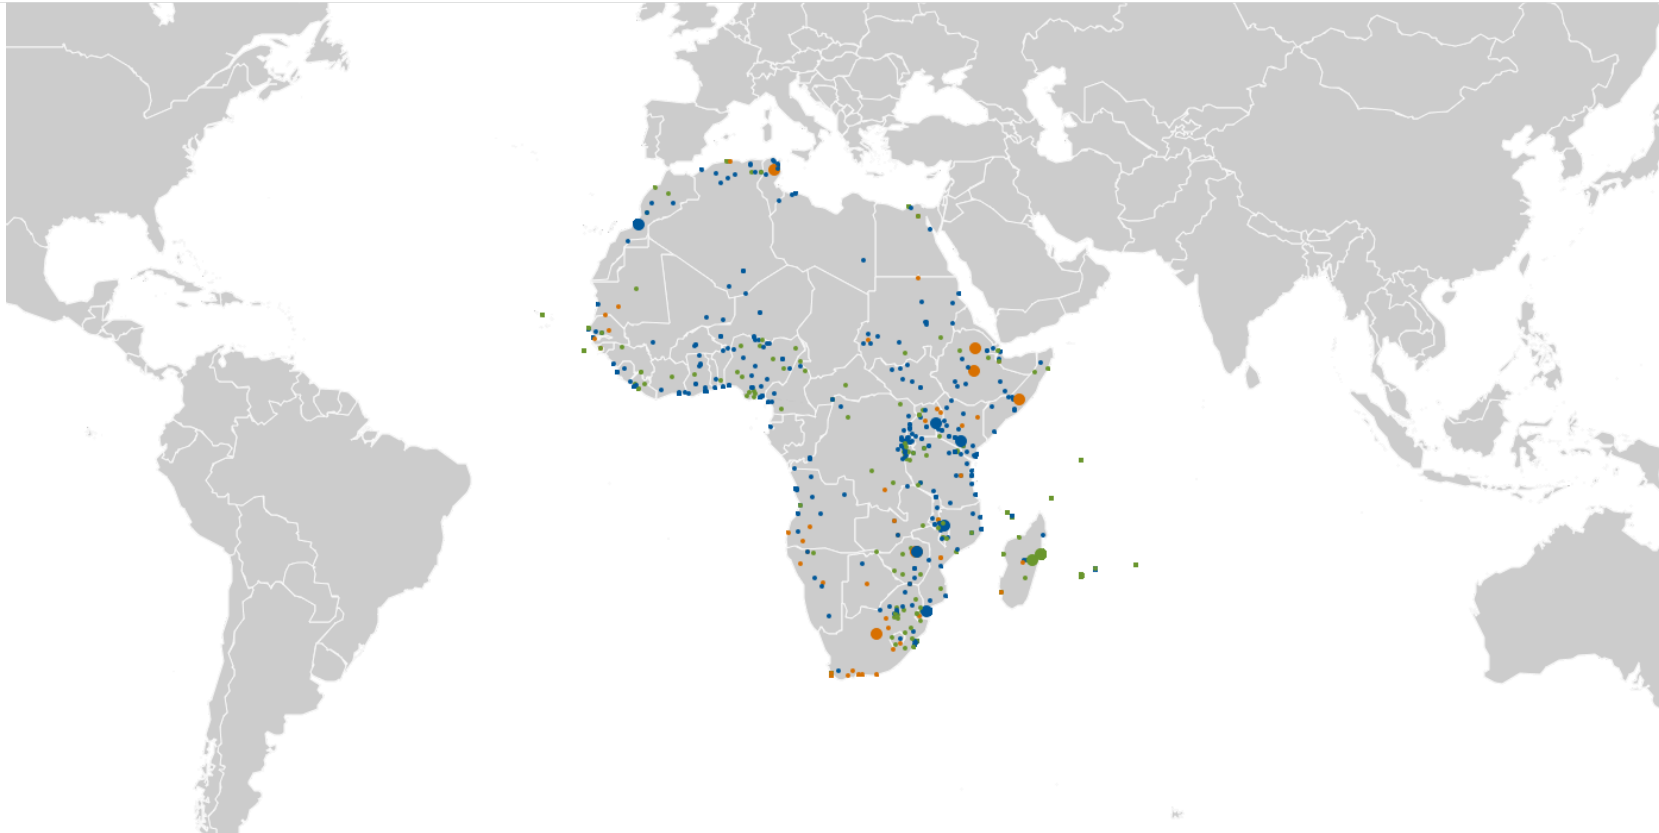

Source: Munich Re, NatCatSERVICE, 2019

- Small, medium and large loss events
  - Catastrophes
  - Meteorological events  
(Tropical cyclone, extratropical storm,  
convective storm, local storm)
  - Hydrological events  
(Flood, mass movement)
  - Climatological events  
(Extreme temperature, drought, forest fire)
- 476** registered events

## Number of events

Relevant weather-related loss events  
in Africa 2013 – 2018

Number

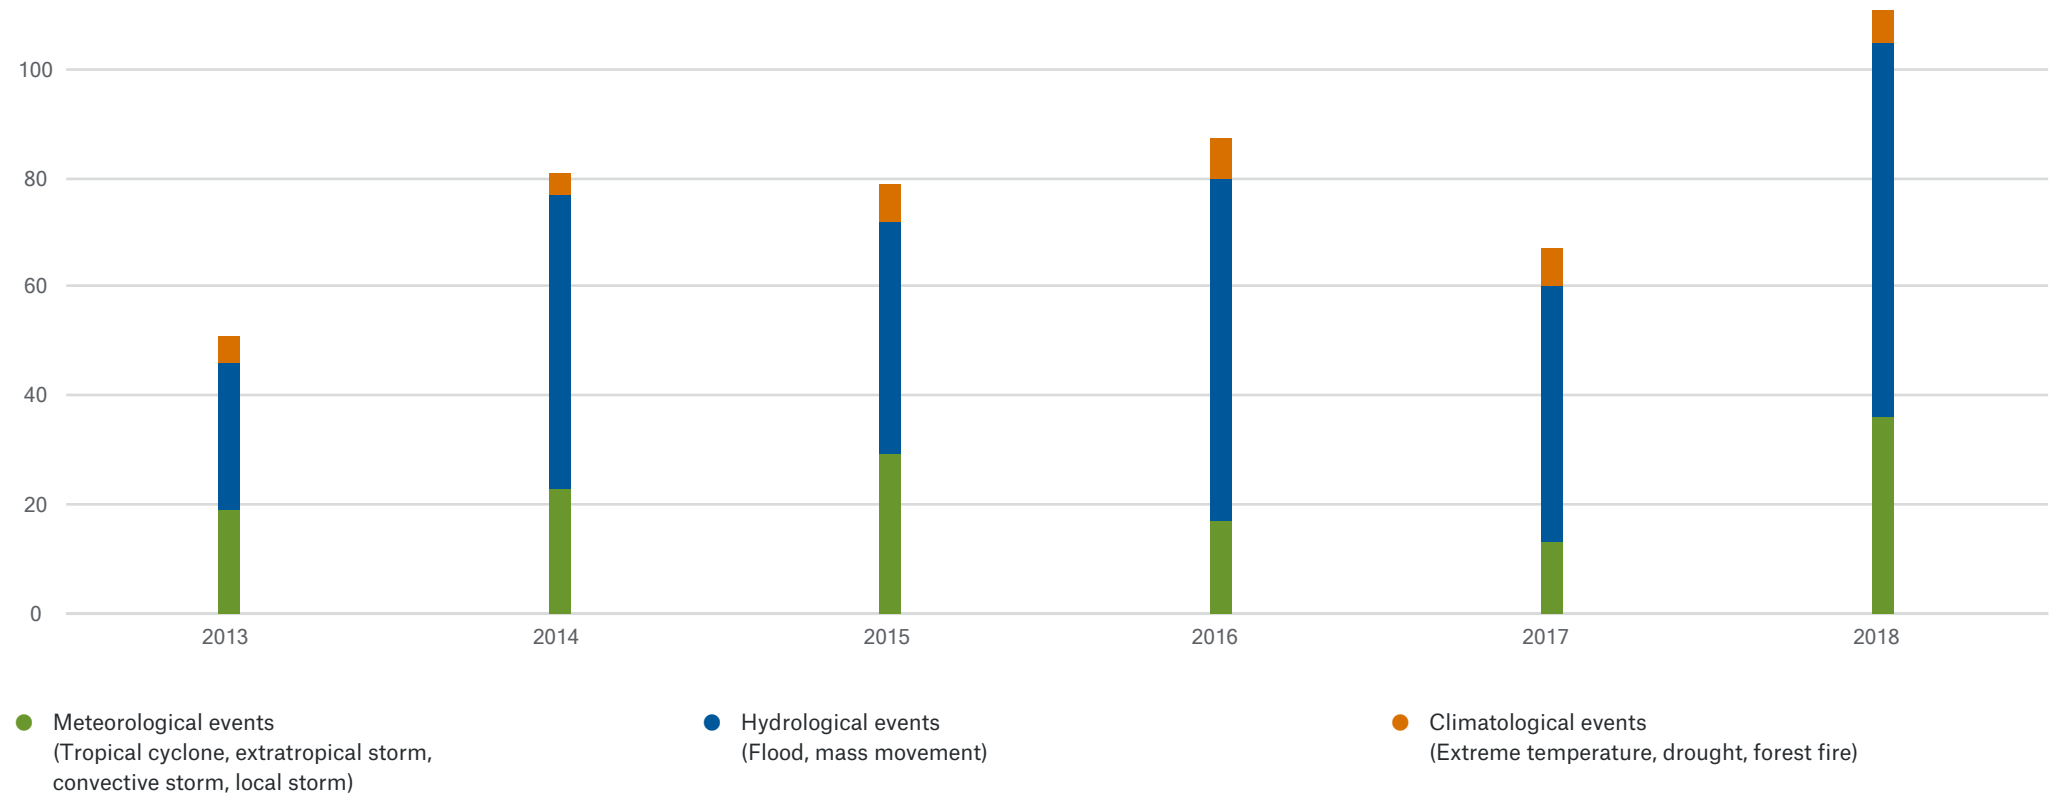

Accounted events have caused at least one fatality and/or produced normalised losses  $\geq$  US\$ 100k, 300k, 1m, or 3m (depending on the assigned World Bank income group of the affected country).

## Number of events

### Catastrophic weather-related loss events in Africa 2013 - 2018

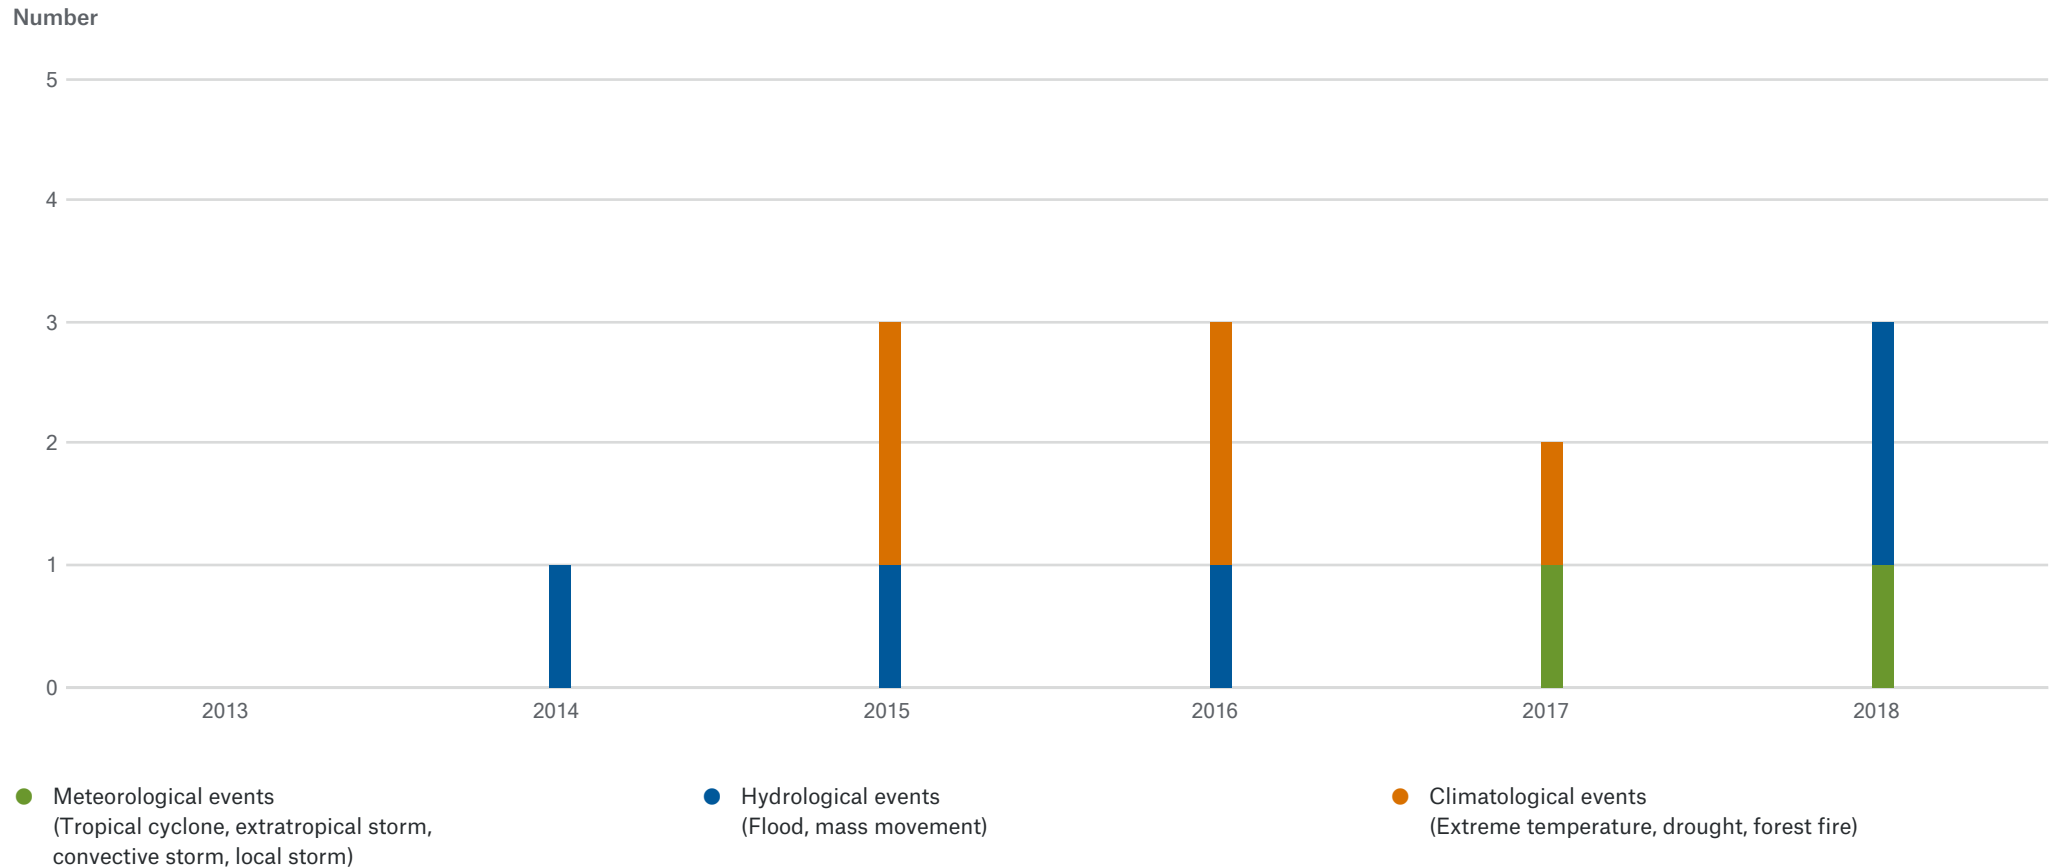

Accounted events have caused  $\geq 1,000$  fatalities and/or produced normalised losses  $\geq$  US\$ 100m, 300m, 1bn, or 3bn (depending on the assigned World Bank income group of the affected country).

# Overall and insured losses in US\$

Relevant weather-related loss events  
in Africa 2013 - 2018

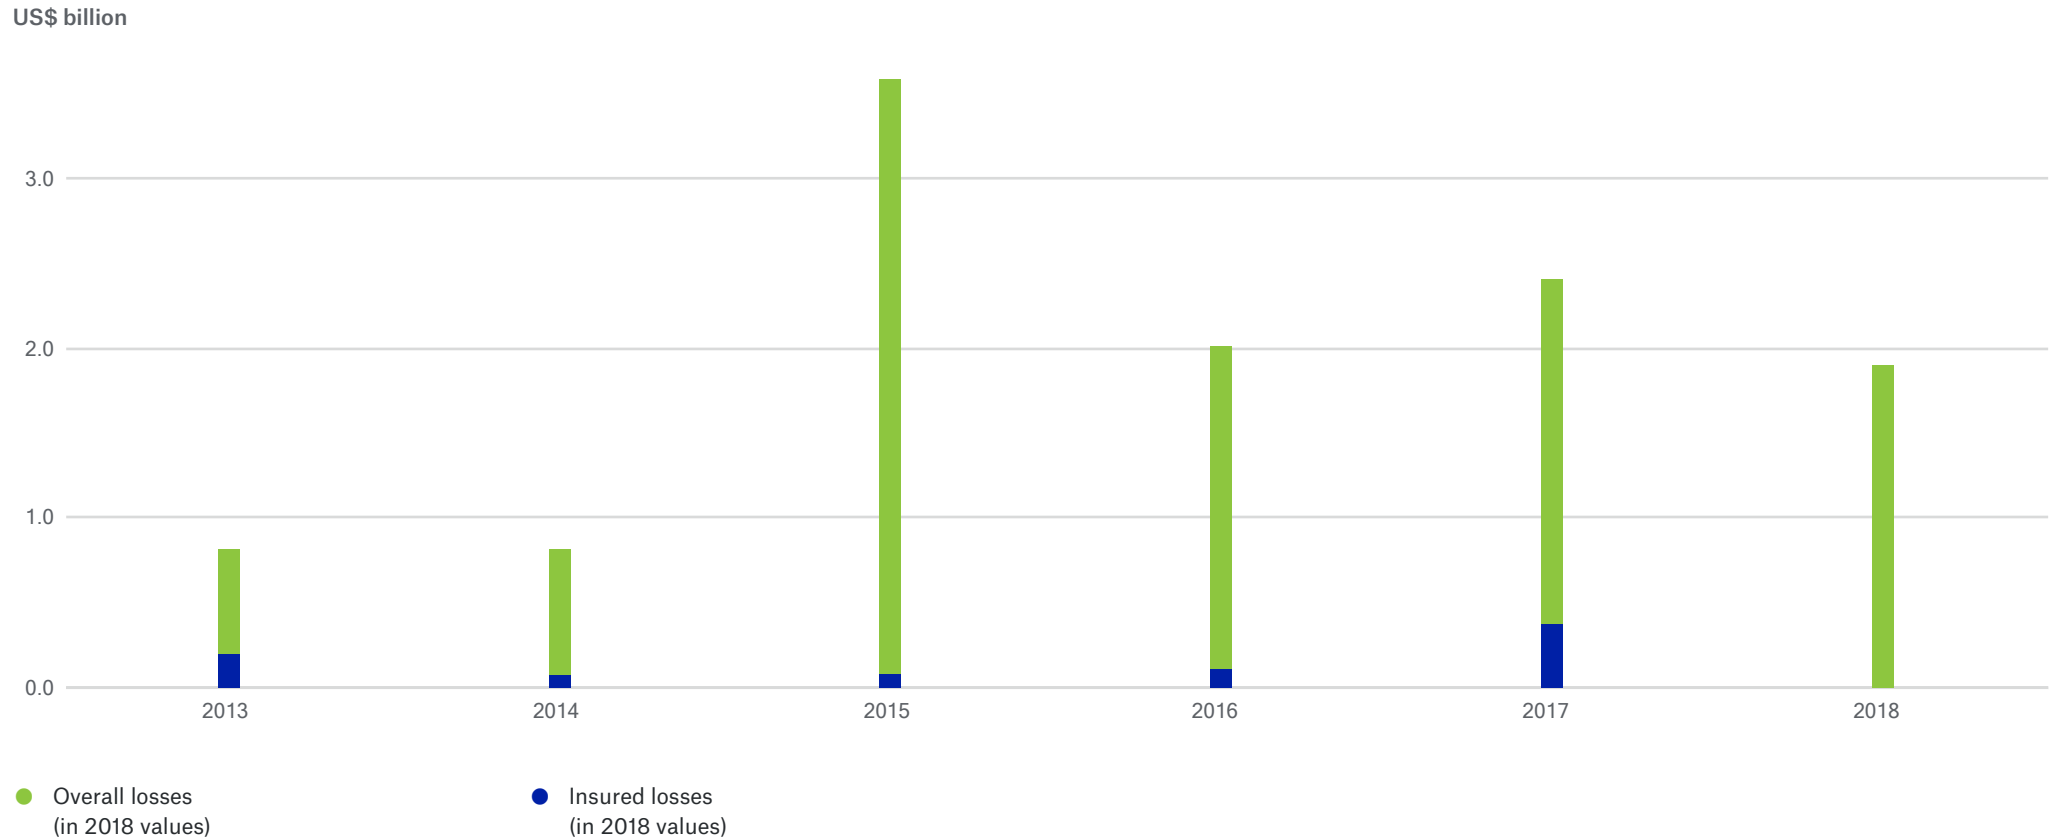

Inflation adjusted via country-specific consumer price index and consideration of exchange rate fluctuations between local currency and US\$.

# Overall and insured losses in US\$

Catastrophic weather-related loss events  
in Africa 2013 - 2018

US\$ billion

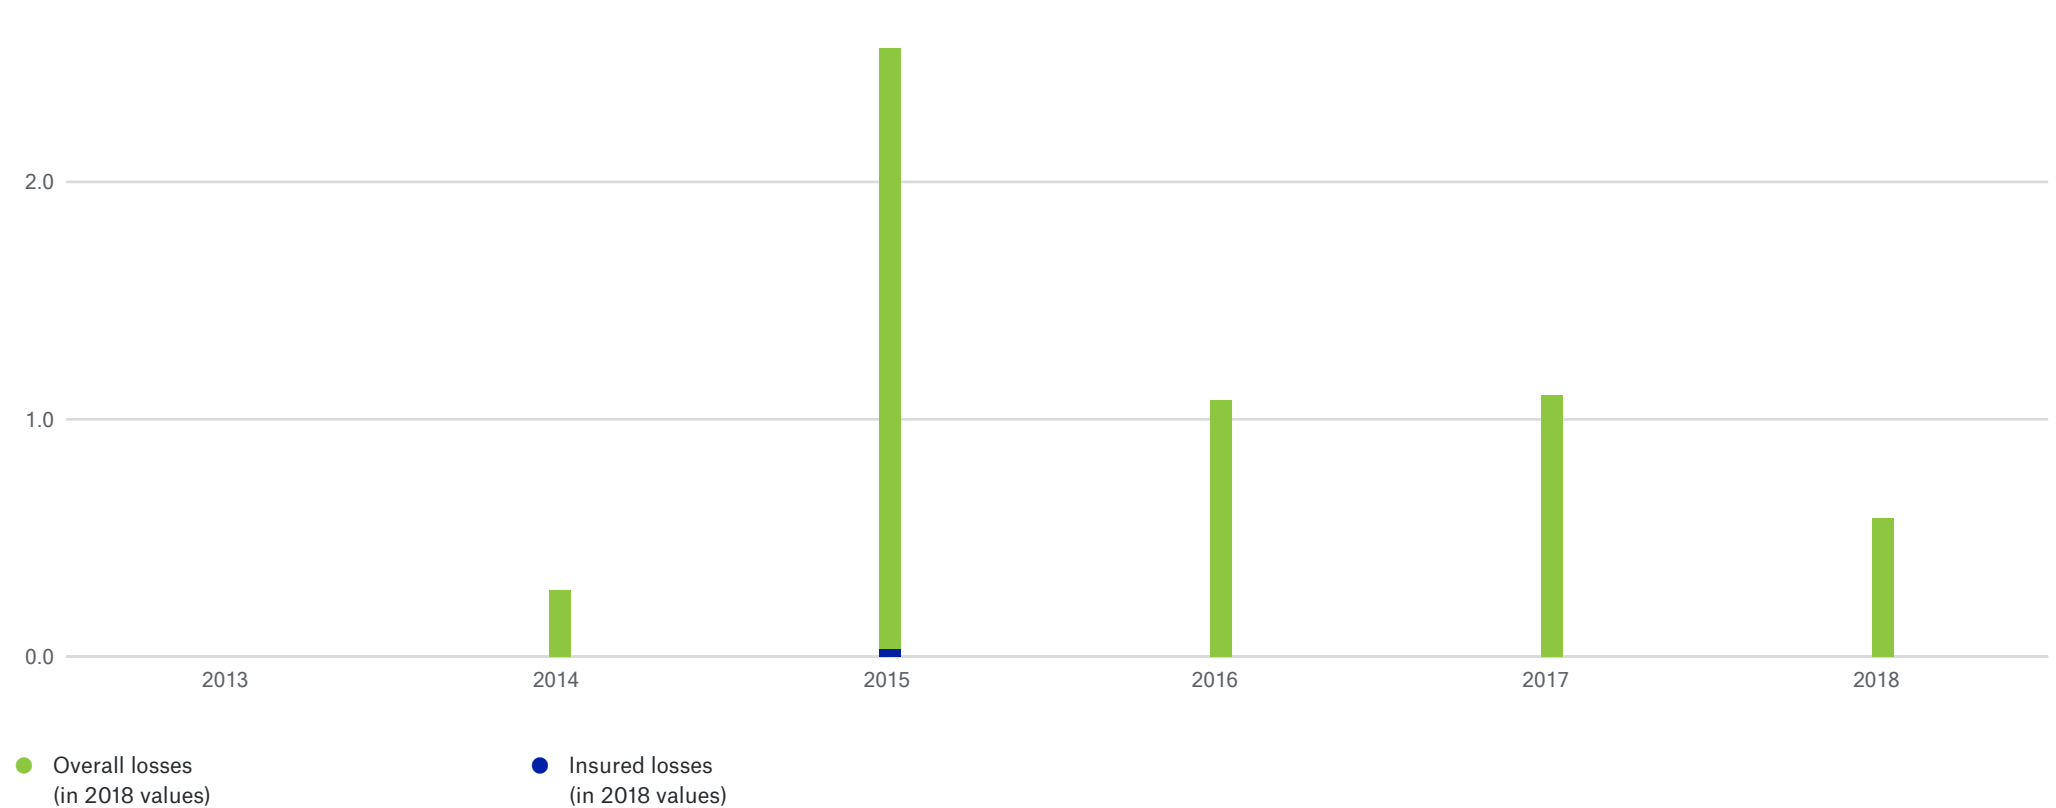

Inflation adjusted via country-specific consumer price index and consideration of exchange rate fluctuations between local currency and US\$.

# Overall losses in US\$: nominal, inflation adjusted, and normalised

Relevant weather-related loss events  
in Africa 2013 - 2018

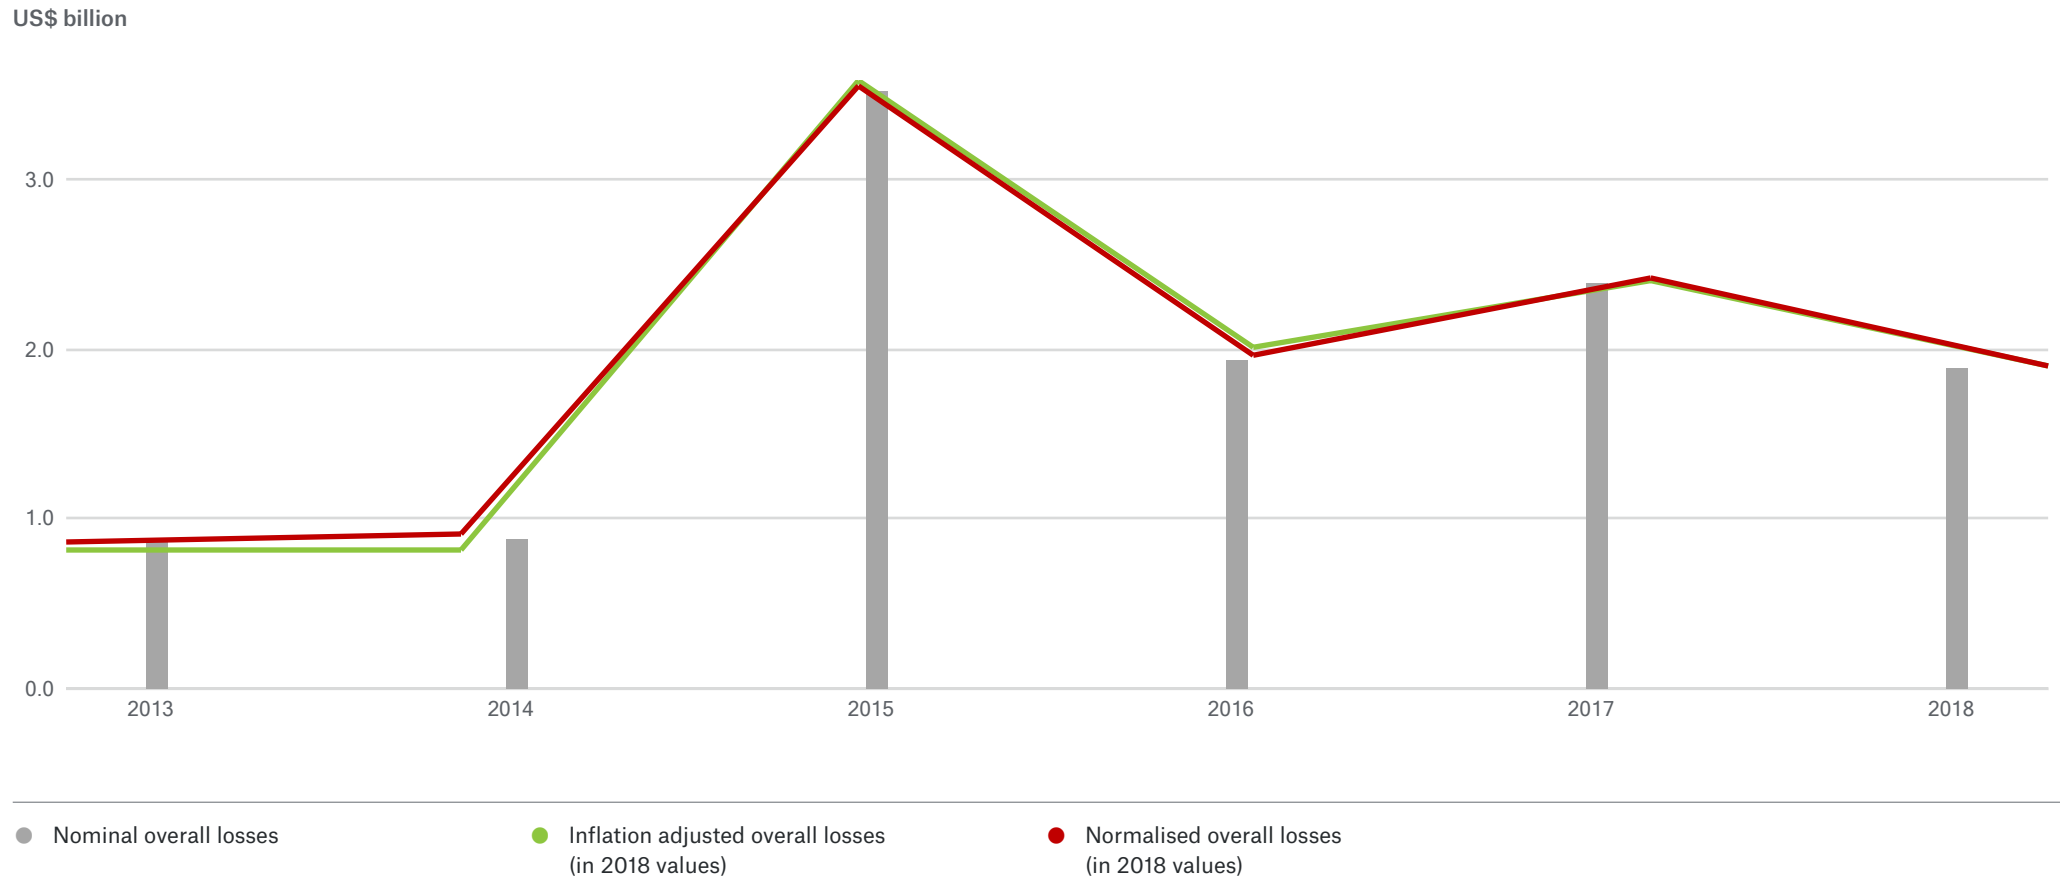

Inflation adjusted via country-specific consumer price index and consideration of exchange rate fluctuations between local currency and US\$.  
Normalization via local GDP developments measured in US\$.

# Overall losses in US\$: nominal, inflation adjusted, and normalised

Catastrophic weather-related loss events  
in Africa 2013 - 2018

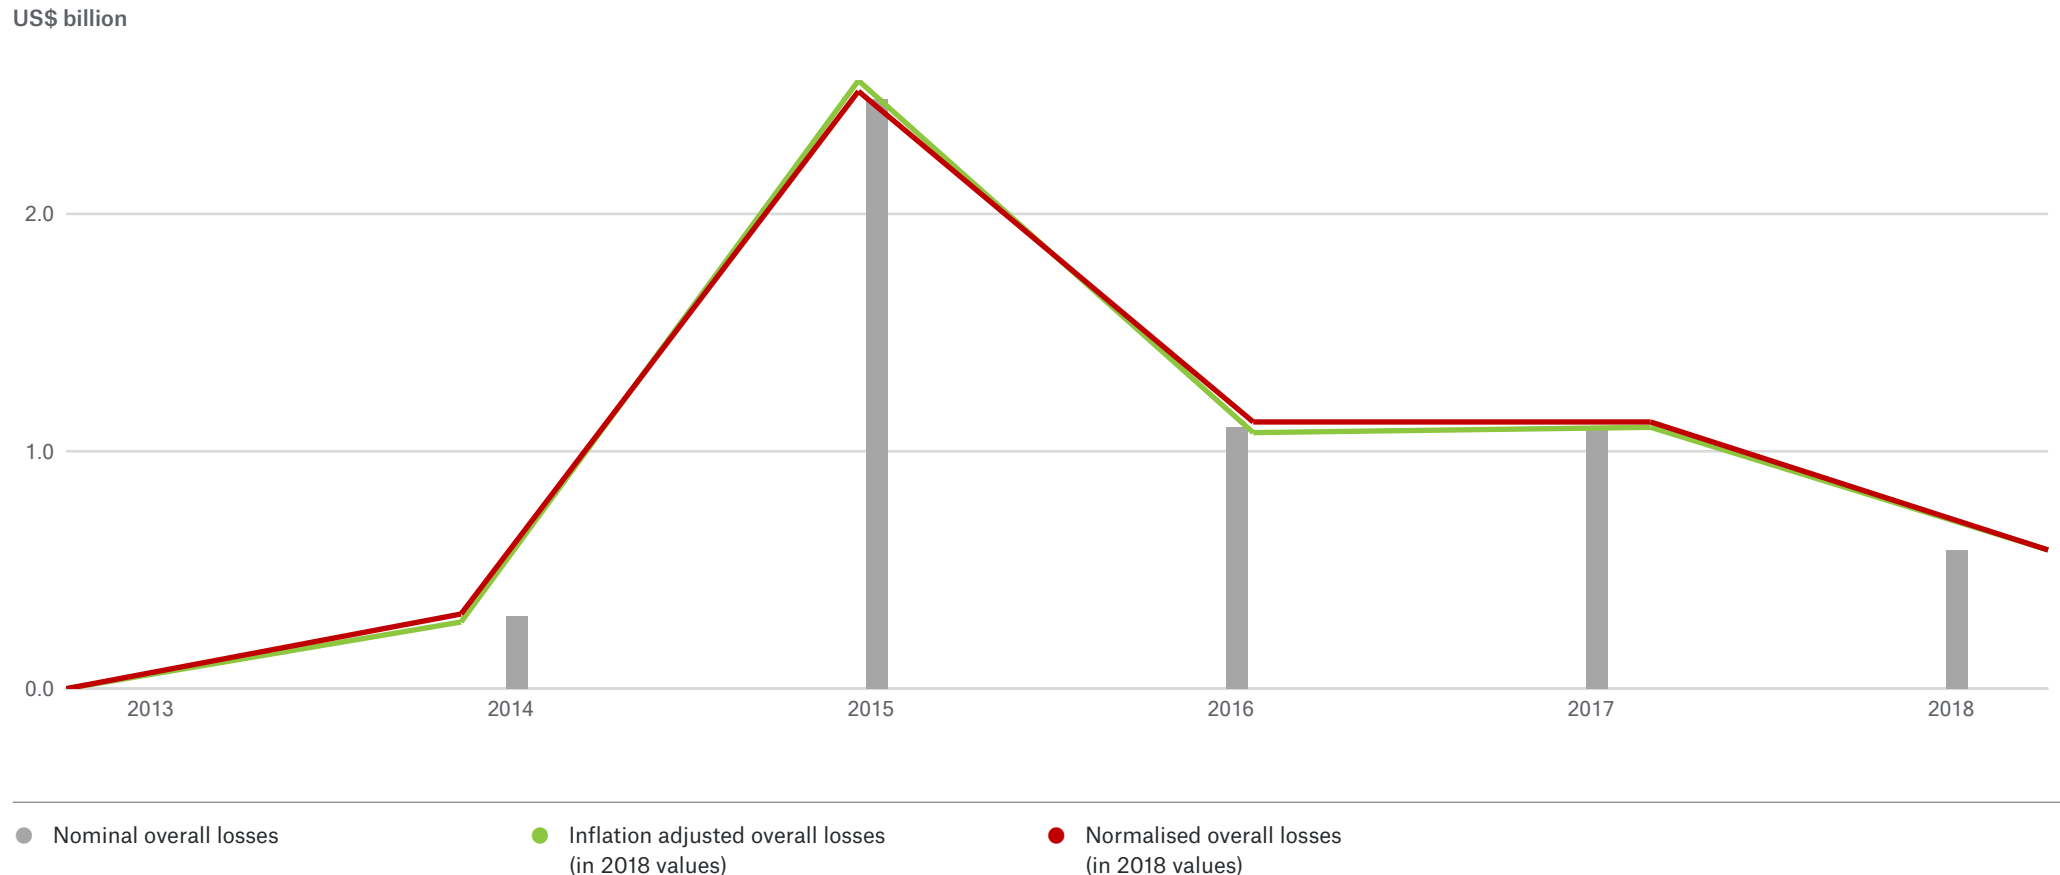

Inflation adjusted via country-specific consumer price index and consideration of exchange rate fluctuations between local currency and US\$.  
Normalization via local GDP developments measured in US\$.

## Percentage distribution by event family

Relevant weather-related loss events  
in Africa 2013 – 2018

Number of events:  
**476**

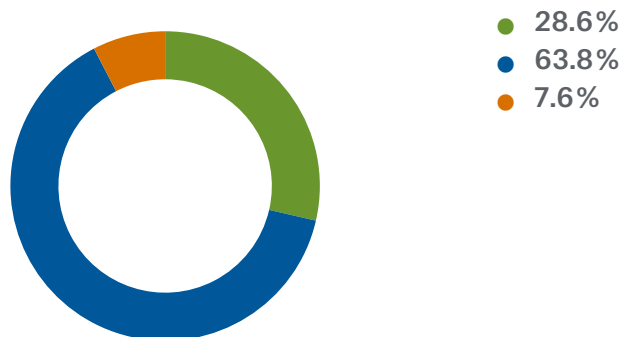

Overall losses:  
**US\$ 11,500m**

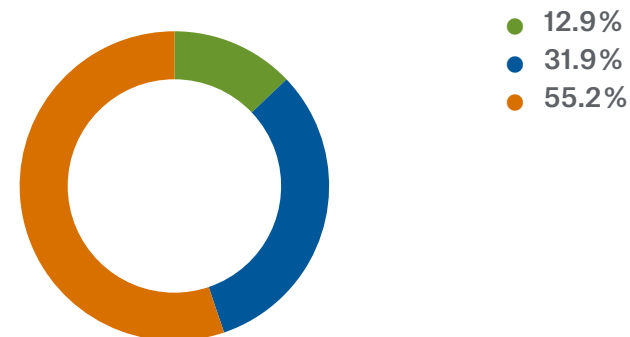

Fatalities : **7,247**

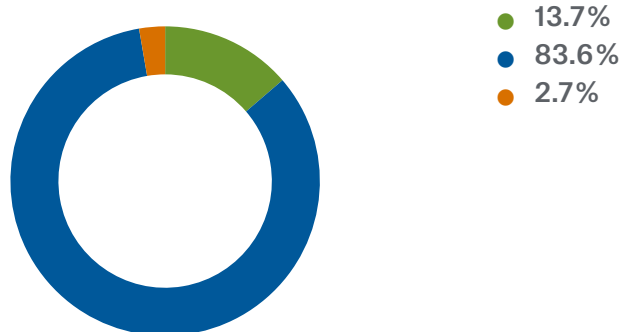

Insured losses :  
**US\$ 810m**

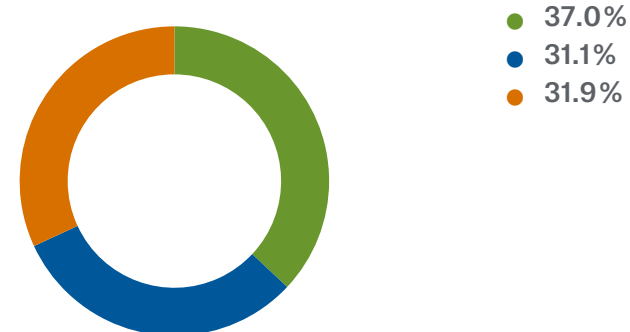

● Meteorological events  
(Tropical cyclone, extratropical storm,  
convective storm, local storm)

● Hydrological events  
(Flood, mass movement)

● Climatological events  
(Extreme temperature, drought, forest fire)

Accounted events have caused at least one fatality and/or produced normalised losses  $\geq$  US\$ 100k, 300k, 1m, or 3m (depending on the assigned World Bank income group of the affected country).

Inflation adjusted via country-specific consumer price index and consideration of exchange rate fluctuations between local currency and US\$.

## Percentage distribution by event family

Catastrophic weather-related loss events  
in Africa 2013 – 2018

Number of events:  
**12**

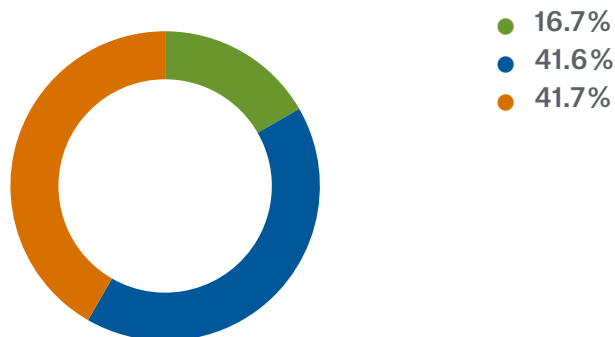

Overall losses:  
**US\$ 5,600m**

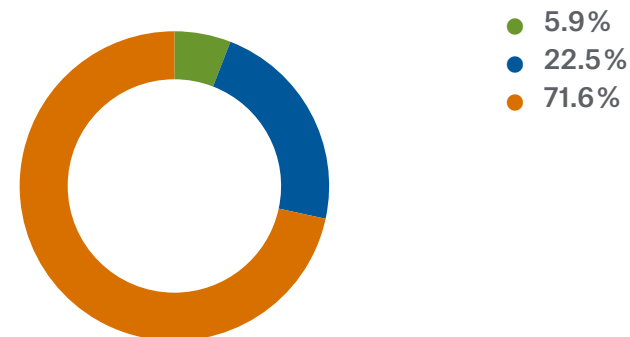

Fatalities : **943**

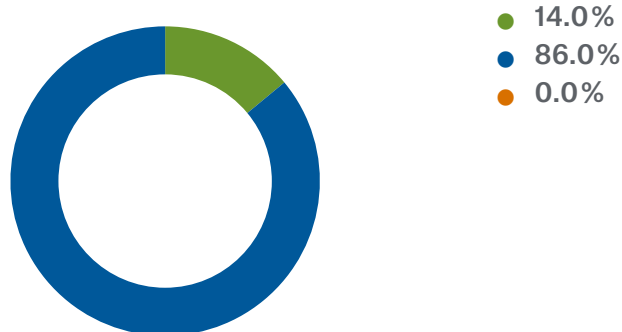

Insured losses :  
**US\$ 27m**

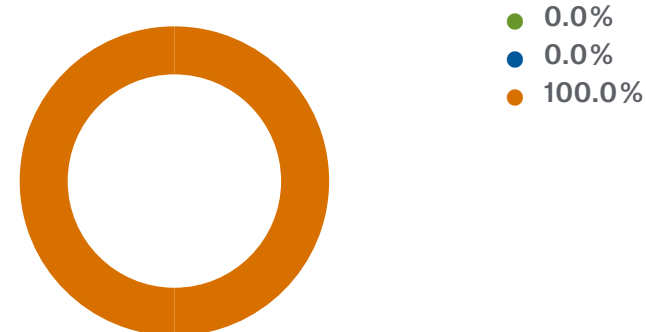

● Meteorological events  
(Tropical cyclone, extratropical storm,  
convective storm, local storm)

● Hydrological events  
(Flood, mass movement)

● Climatological events  
(Extreme temperature, drought, forest fire)

Accounted events have caused  $\geq 1,000$  fatalities and/or produced normalised losses  $\geq$  US\$ 100m, 300m, 1bn, or 3bn (depending on the assigned World Bank income group of the affected country).

Inflation adjusted via country-specific consumer price index and consideration of exchange rate fluctuations between local currency and US\$.

## 5 costliest events ordered by nominal overall losses

### Relevant weather-related loss events in Africa 2013 – 2018

| Date           | Event   | Affected Area                                                                               | Overall losses<br>(US\$m, original values) | Insured losses<br>(US\$m, original values) | Fatalities |
|----------------|---------|---------------------------------------------------------------------------------------------|--------------------------------------------|--------------------------------------------|------------|
| Jan - Dec 2015 | Drought | South Africa, Angola, Zimbabwe, Botswana, Madagascar, Malawi, Mozambique, Namibia, Zambia   | 1,800                                      |                                            |            |
| Jan - Dec 2017 | Drought | Somalia, Ethiopia, Kenya                                                                    | 930                                        |                                            |            |
| Jun - Dec 2015 | Drought | Ethiopia, Somalia                                                                           | 500                                        |                                            |            |
| Jan - Oct 2016 | Drought | Zimbabwe, Angola, Lesotho, Madagascar, Mozambique, Namibia, South Africa, Swaziland, Zambia | 500                                        |                                            |            |
| Jan - Dec 2016 | Drought | Tunisia: Kairouan, Monastir, Jendouba                                                       | 500                                        |                                            |            |

## 5 costliest events ordered by nominal insured losses

### Relevant weather-related loss events in Africa 2013 – 2018

| Date                | Event                       | Affected Area                                                                                                                           | Overall losses<br>(US\$m, original values) | Insured losses<br>(US\$m, original values) | Fatalities |
|---------------------|-----------------------------|-----------------------------------------------------------------------------------------------------------------------------------------|--------------------------------------------|--------------------------------------------|------------|
| 7 - 13 Jun 2017     | Wildfire (Knysna Fire)      | South Africa: Western Cape, Eden, Knysna, Cape Town, Brenton-on-Sea, Belvedere, Nania, Eastford, Welbedacht, Green Pastures, Rheenendal | 420                                        | 200                                        | 9          |
| 28 Nov - 1 Dec 2013 | Hailstorm, flash flood      | South Africa, Swaziland                                                                                                                 | 300                                        | 160                                        | 2          |
| 9 - 10 Oct 2017     | Flash flood, hail           | South Africa: KwaZulu-Natal, eThekwin, Durban, Nquthu, Gauteng                                                                          | 320                                        | 140                                        | 13         |
| 2 Jan 2014          | Cyclone Bejisa, storm surge | Reunion: Le Port, Saint-Gilles, Saint-Leu, Le Tampon                                                                                    | 150                                        | 60                                         | 1          |
| 9 Nov 2016          | Flash flood, severe storm   | South Africa: Gauteng, Alexandra, Ekurhuleni, Johannesburg                                                                              | 150                                        | 50                                         | 6          |

## 5 deadliest events

### Relevant weather-related loss events in Africa 2013 – 2018

| Date                | Event       | Affected Area                                                                                                            | Overall losses<br>(US\$m, original values) | Insured losses<br>(US\$m, original values) | Fatalities |
|---------------------|-------------|--------------------------------------------------------------------------------------------------------------------------|--------------------------------------------|--------------------------------------------|------------|
| 14 Aug 2017         | Landslide   | Sierra Leone: Western Area, Freetown, Regent                                                                             | 30                                         |                                            | 500        |
| Jan - Mar 2015      | Flood       | Malawi, Mozambique, South Africa, Zimbabwe                                                                               | 470                                        |                                            | 430        |
| Jan - Apr 2013      | Flood       | South Africa, Angola, Botswana, Malawi, Mozambique, Zimbabwe                                                             | 40                                         |                                            | 272        |
| 2 - 5 Jun 2015      | Flash flood | Ghana, Togo                                                                                                              | 100                                        |                                            | 263        |
| Dec 2016 - Feb 2017 | Flood       | Zimbabwe: Harare, Mashonaland East, Mashonaland West, Mashonaland Central, Masvingo, Midlands, Metabeleland North, Binga | 100                                        |                                            | 246        |

## 5 costliest events ordered by inflation adjusted overall losses

### Relevant weather-related loss events in Africa 2013 – 2018

| Date           | Event   | Affected Area                                                                               | Overall losses<br>(US\$m, in 2018 values) | Insured losses<br>(US\$m, in 2018 values) | Fatalities |
|----------------|---------|---------------------------------------------------------------------------------------------|-------------------------------------------|-------------------------------------------|------------|
| Jan - Dec 2015 | Drought | South Africa, Angola, Zimbabwe, Botswana, Madagascar, Malawi, Mozambique, Namibia, Zambia   | 1,900                                     |                                           |            |
| Jan - Dec 2017 | Drought | Somalia, Ethiopia, Kenya                                                                    | 930                                       |                                           |            |
| Jan - Oct 2016 | Drought | Zimbabwe, Angola, Lesotho, Madagascar, Mozambique, Namibia, South Africa, Swaziland, Zambia | 510                                       |                                           |            |
| Jan - May 2018 | Drought | South Africa: Western Cape, Cape Town                                                       | 500                                       |                                           |            |
| Jun - Dec 2015 | Drought | Ethiopia, Somalia                                                                           | 500                                       |                                           |            |

## 5 costliest events ordered by inflation adjusted insured losses

### Relevant weather-related loss events in Africa 2013 – 2018

| Date                | Event                       | Affected Area                                                                                                                           | Overall losses<br>(US\$m, in 2018 values) | Insured losses<br>(US\$m, in 2018 values) | Fatalities |
|---------------------|-----------------------------|-----------------------------------------------------------------------------------------------------------------------------------------|-------------------------------------------|-------------------------------------------|------------|
| 7 - 13 Jun 2017     | Wildfire (Knysna Fire)      | South Africa: Western Cape, Eden, Knysna, Cape Town, Brenton-on-Sea, Belvedere, Nania, Eastford, Welbedacht, Green Pastures, Rheenendal | 420                                       | 200                                       | 9          |
| 28 Nov - 1 Dec 2013 | Hailstorm, flash flood      | South Africa, Swaziland                                                                                                                 | 270                                       | 140                                       | 2          |
| 9 - 10 Oct 2017     | Flash flood, hail           | South Africa: KwaZulu-Natal, eThekwin, Durban, Nquthu, Gauteng                                                                          | 320                                       | 140                                       | 13         |
| 9 Nov 2016          | Flash flood, severe storm   | South Africa: Gauteng, Alexandra, Ekurhuleni, Johannesburg                                                                              | 180                                       | 58                                        | 6          |
| 2 Jan 2014          | Cyclone Bejisa, storm surge | Reunion: Le Port, Saint-Gilles, Saint-Leu, Le Tampon                                                                                    | 130                                       | 51                                        | 1          |

## 5 costliest events ordered by normalised overall losses

### Relevant weather-related loss events in Africa 2013 – 2018

| Date           | Event   | Affected Area                                                                               | Overall losses<br>(US\$m, in 2018 values) | Fatalities |
|----------------|---------|---------------------------------------------------------------------------------------------|-------------------------------------------|------------|
| Jan - Dec 2015 | Drought | South Africa, Angola, Zimbabwe, Botswana, Madagascar, Malawi, Mozambique, Namibia, Zambia   | 1,700                                     |            |
| Jan - Dec 2017 | Drought | Somalia, Ethiopia, Kenya                                                                    | 950                                       |            |
| Jun - Dec 2015 | Drought | Ethiopia, Somalia                                                                           | 620                                       |            |
| Jan - Oct 2016 | Drought | Zimbabwe, Angola, Lesotho, Madagascar, Mozambique, Namibia, South Africa, Swaziland, Zambia | 540                                       |            |
| Jan - May 2018 | Drought | South Africa: Western Cape, Cape Town                                                       | 500                                       |            |

## Explanation for the interpretation of loss data statistics

### Number statistics and loss thresholds

Number statistics are influenced by a constantly improved reporting of small-scale loss events over the time (*reporting bias*). There is a need to distinguish between **registered** and **relevant** loss events.

- **Registered loss events** are all events recorded by NatCatSERVICE. The range extends from *insignificant* to *catastrophic* loss events expressed in overall losses and / or fatalities. The reporting bias is particularly high for high frequency and low impact events.
- **Relevant loss events** exceed defined thresholds of *normalised* overall losses and/or fatalities. These events are considered in number statistics and trend analyses. Threshold values are:
  - Fatalities  $\geq 1$
  - Normalized overall loss  $\geq$  US\$ 100k, 300k, 1m, or 3m (depending on assigned World Bank income group of each affected country)
- **Type of data filtering is helpful for** reduction/elimination of reporting bias and for conclusions on changes in frequency of occurred loss events.

# Explanation for the interpretation of loss data statistics

## Inflation adjustment and normalization of NatCat loss data

### Three ways of presenting loss data:

- Nominal losses: values as they originally occurred
- Inflation adjusted losses: accounting for changes in monetary equivalent
- Normalized losses: accounting for growth of values and assets

### Inflation adjustment:

- Loss value in local currency is *adjusted to inflation* via the country's consumer price index (CPI) under consideration of exchange rate fluctuations between the local currency and the US\$.

### Normalization:

- Loss value in US\$ is *normalized* via the development of locally resolved (1° x 1°) nominal gross domestic product data in US\$ between year of occurrence and today.

### Inflation adjusted loss data is helpful for...

- How high would a historic loss value be in today's money?

### Normalized loss data is helpful for...

- What losses would a historic event cause when exposing today's values and assets?
- Conclusions on loss drivers like changes on the hazard side or effectivity of prevention measures

© 2018 Münchener Rückversicherungs-Gesellschaft Aktiengesellschaft in München (“Munich Re”). All rights reserved.

The content of this presentation (including, without limitation, text, pictures, graphics, as well as the arrangement thereof) is protected under copyright law and other protective legislation. These materials or any portions thereof may be used solely for personal and non-commercial purposes. Any other use requires Munich Re’s prior written approval.

Munich Re has used its discretion, best judgement and every reasonable effort in compiling the information and components contained in this presentation. It may not be held liable, however, for the completeness, correctness, topicality and technical accuracy of any information contained herein. Munich Re assumes no liability with regard to updating the information or other content provided in this presentation or to adapting this to conform with future events or developments.
