# Supplementary material
Source: publisher figshare collection journal article supplement (https://tandf.figshare.com/articles/dataset/_/9918716)
Supplement: Supplementary file 1 [file 1 › 3d. Supplementary material_Insurance losses_Caribbean_2013-2018.pdf]

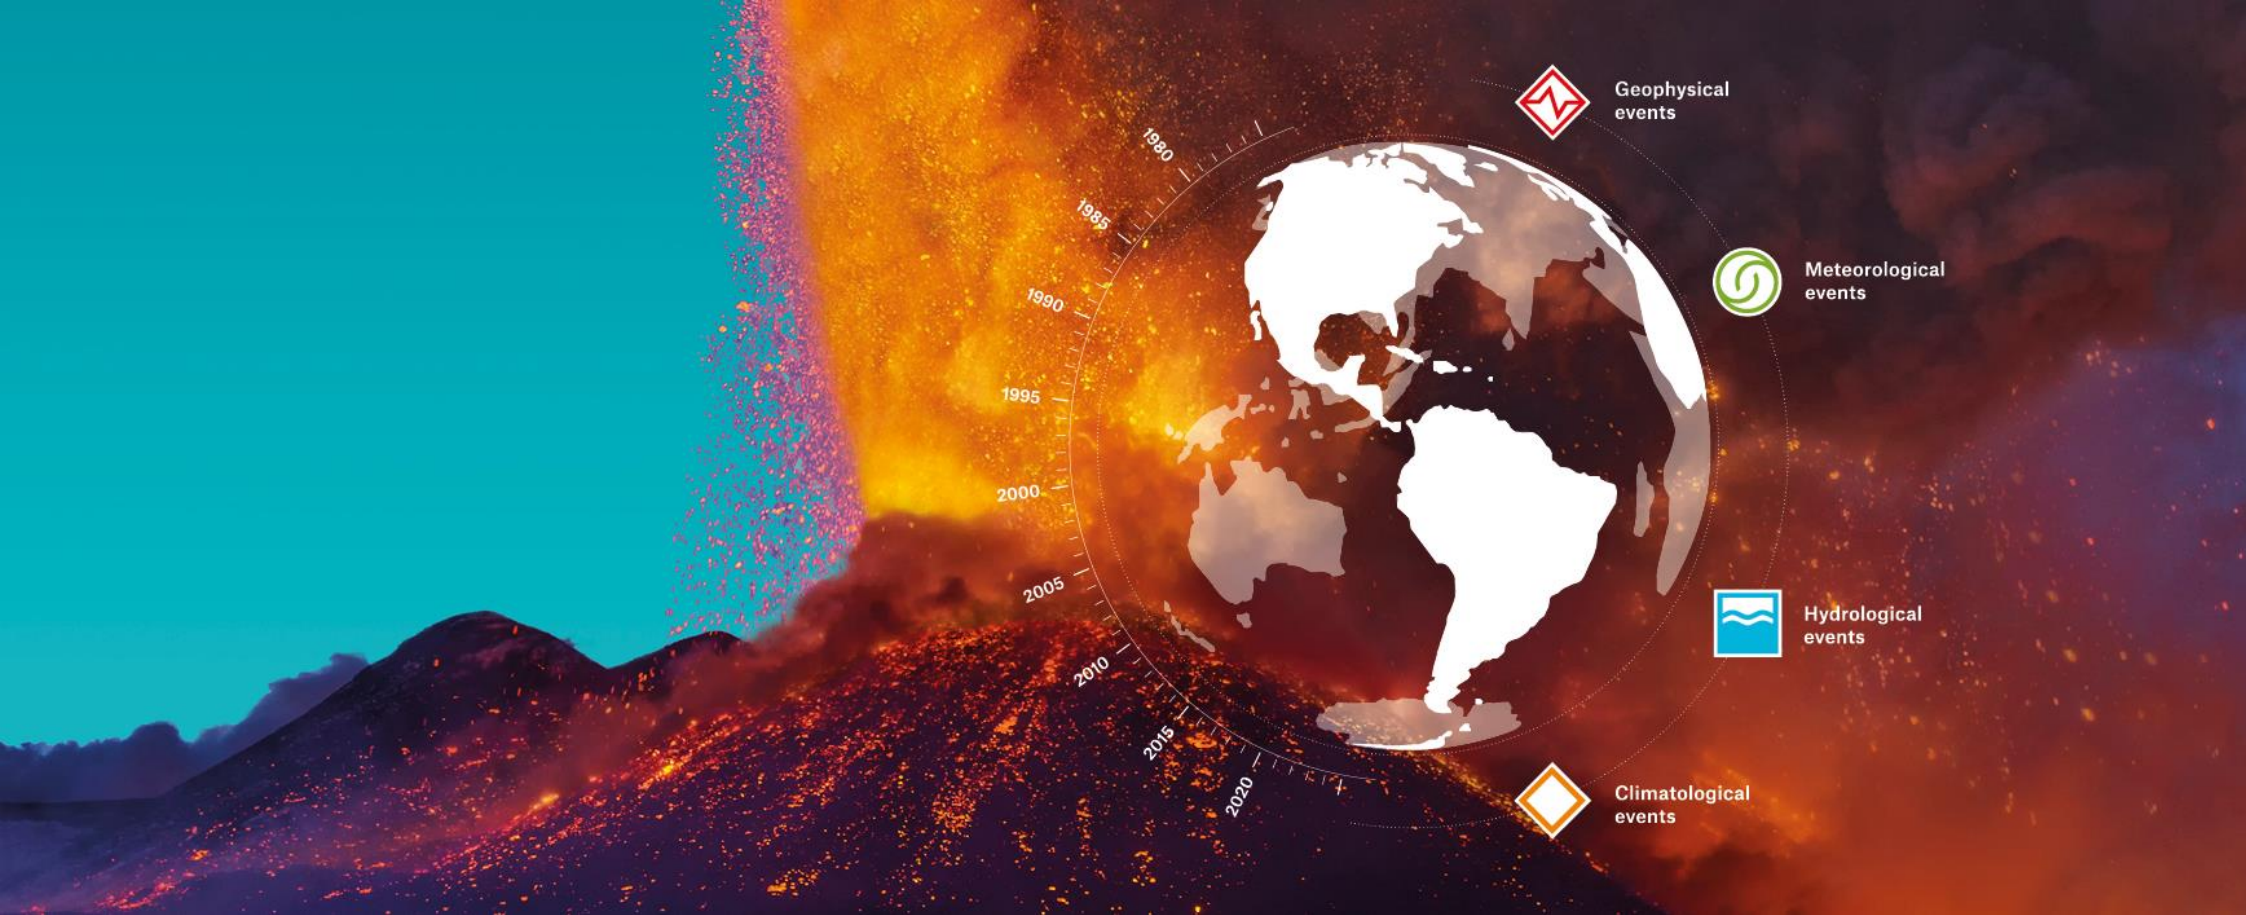

# NatCatSERVICE

## Tropical cyclone events in the Caribbean 2013 – 2018

## Geographical overview

Relevant tropical cyclone events  
in the Caribbean 2013 – 2018

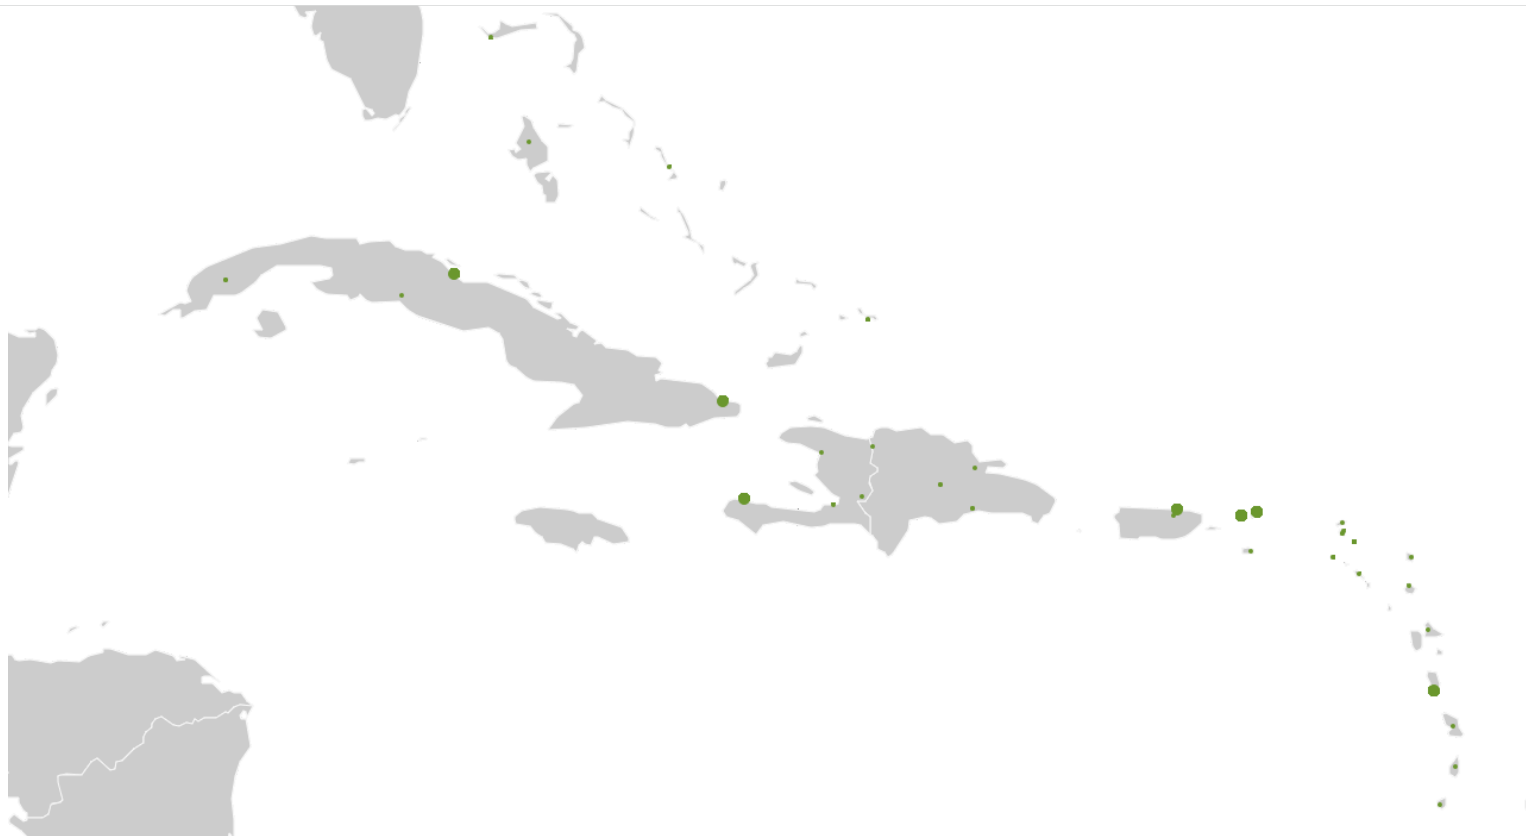

Source: Munich Re, NatCatSERVICE, 2019

● Small, medium and large loss events

● Catastrophes

10 registered events

● Meteorological events  
(Tropical cyclone, extratropical storm,  
convective storm, local storm)

## Number of events

Relevant tropical cyclone events  
in the Caribbean 2013 – 2018

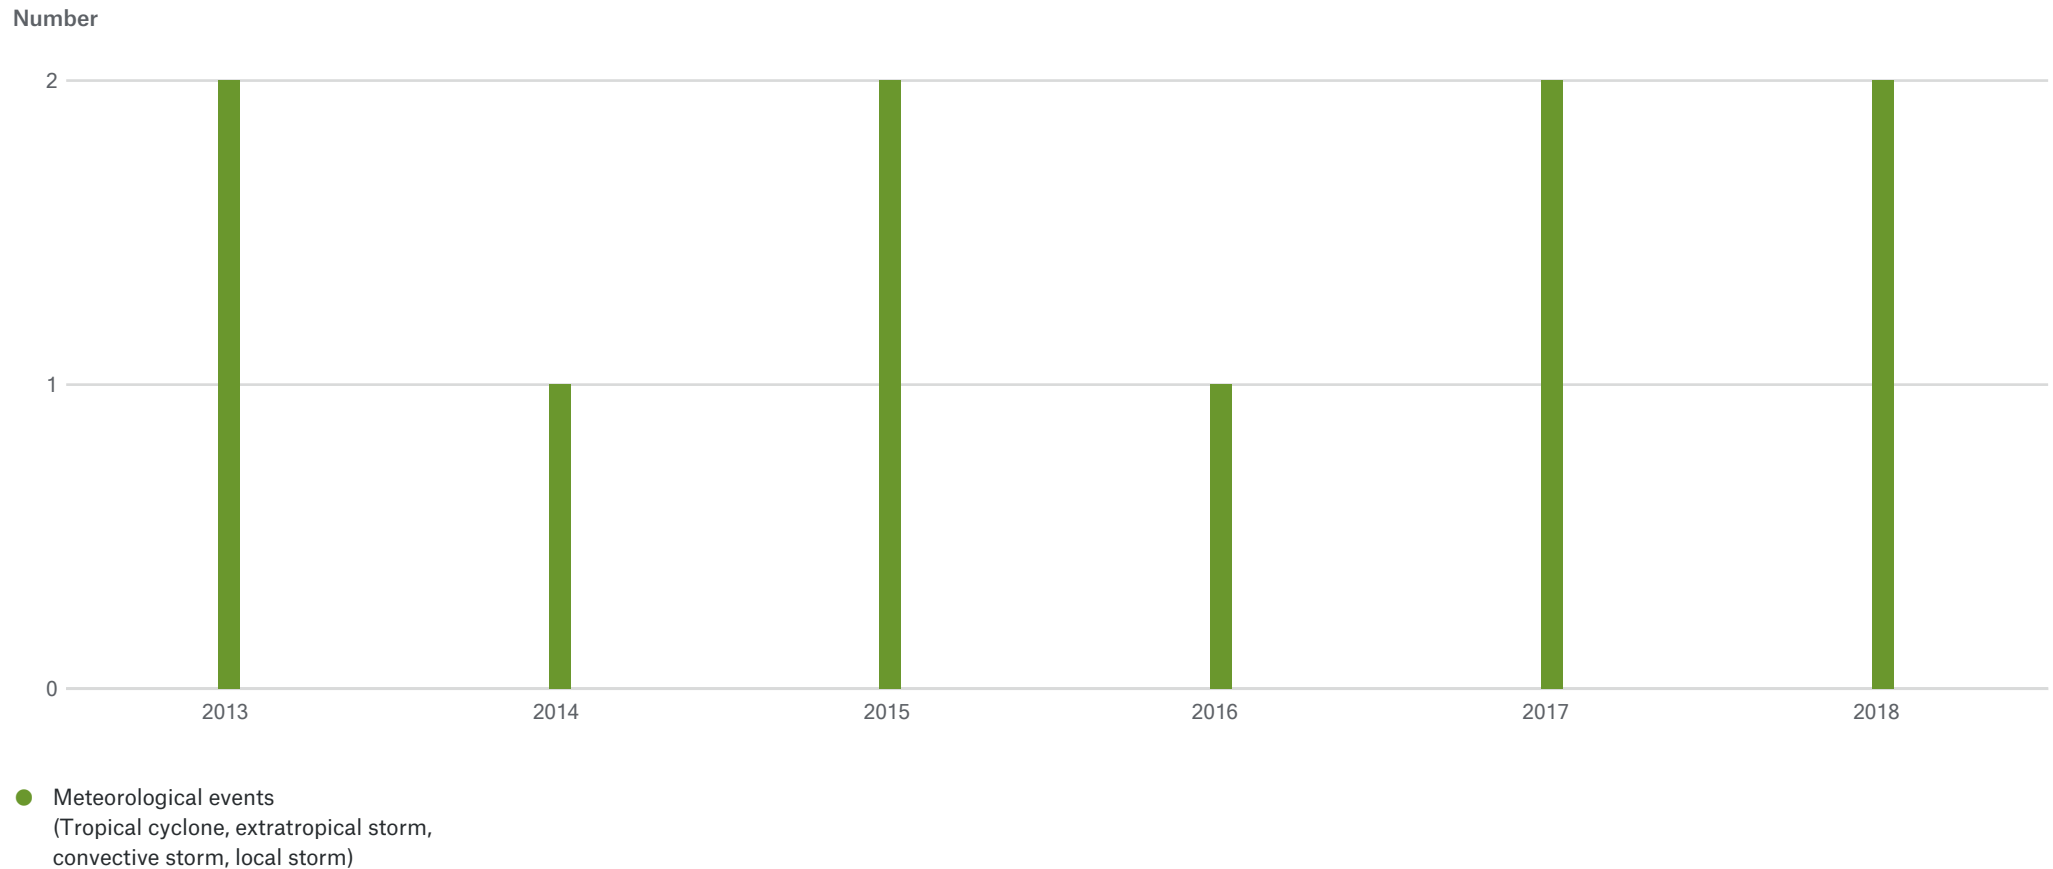

Accounted events have caused at least one fatality and/or produced normalised losses  $\geq$  US\$ 100k, 300k, 1m, or 3m (depending on the assigned World Bank income group of the affected country).

## Number of events

### Catastrophic tropical cyclone events in the Caribbean 2013 - 2018

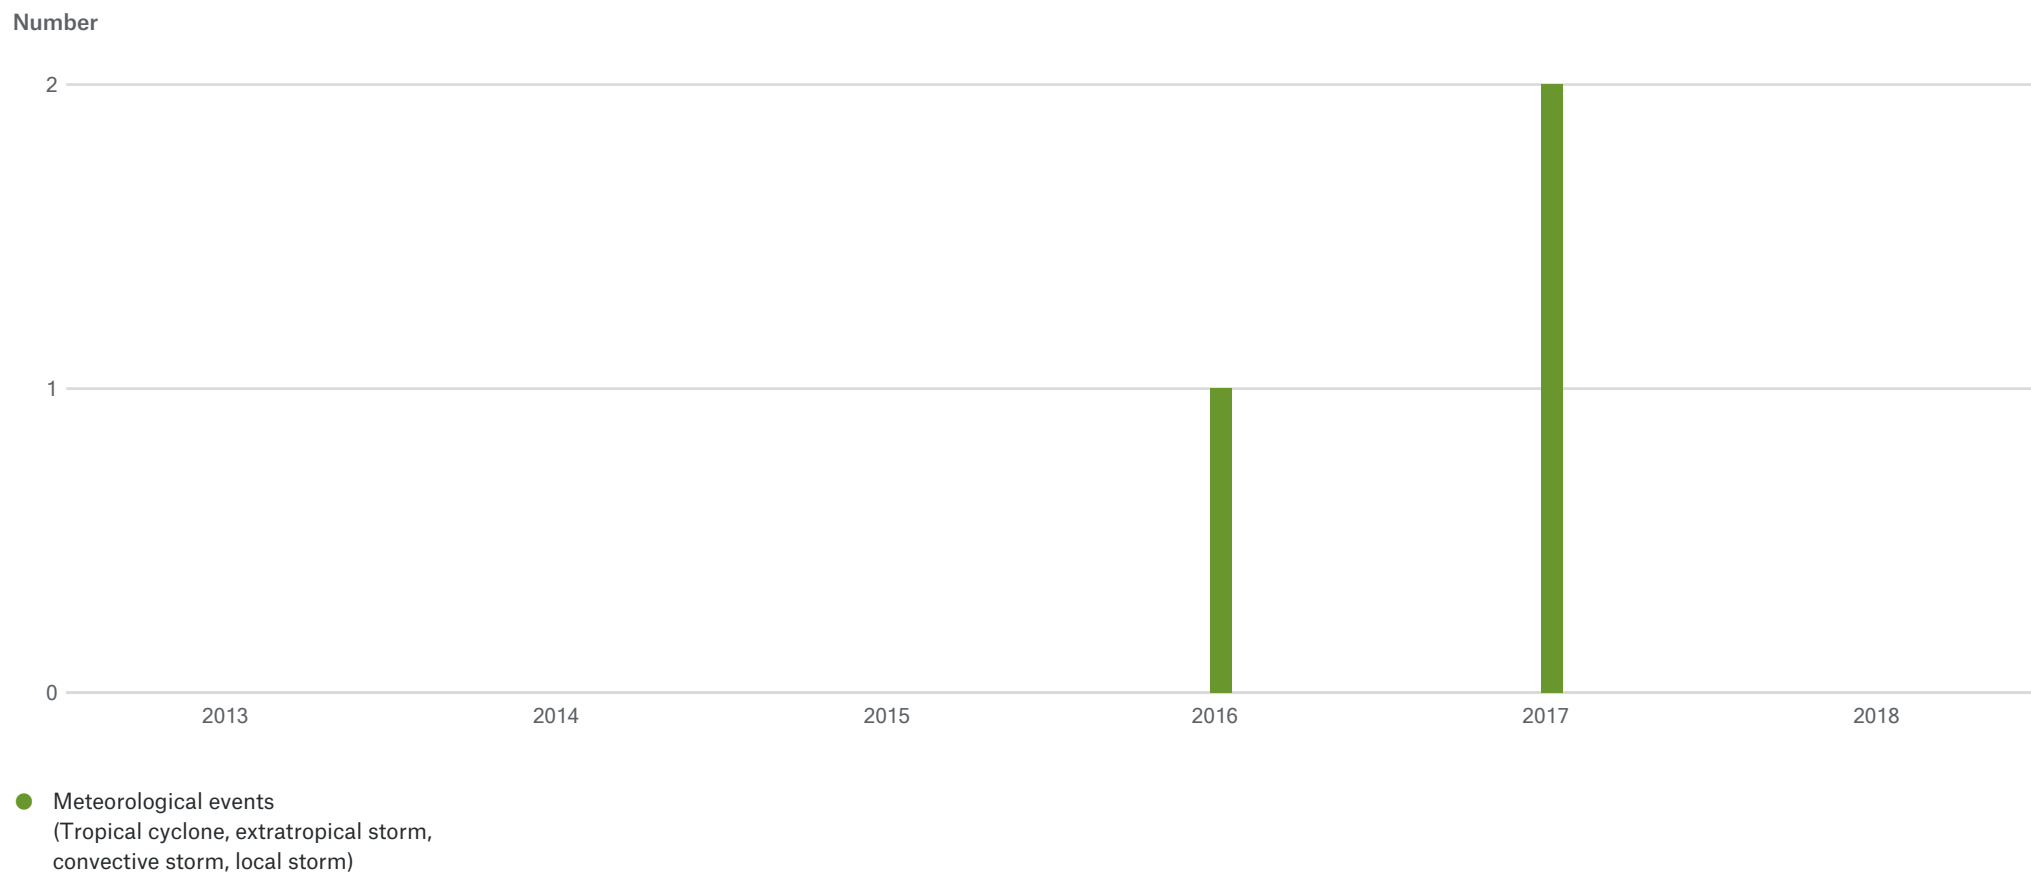

Accounted events have caused  $\geq 1,000$  fatalities and/or produced normalised losses  $\geq$  US\$ 100m, 300m, 1bn, or 3bn (depending on the assigned World Bank income group of the affected country).

## Overall and insured losses in US\$

Relevant tropical cyclone events  
in the Caribbean 2013 – 2018

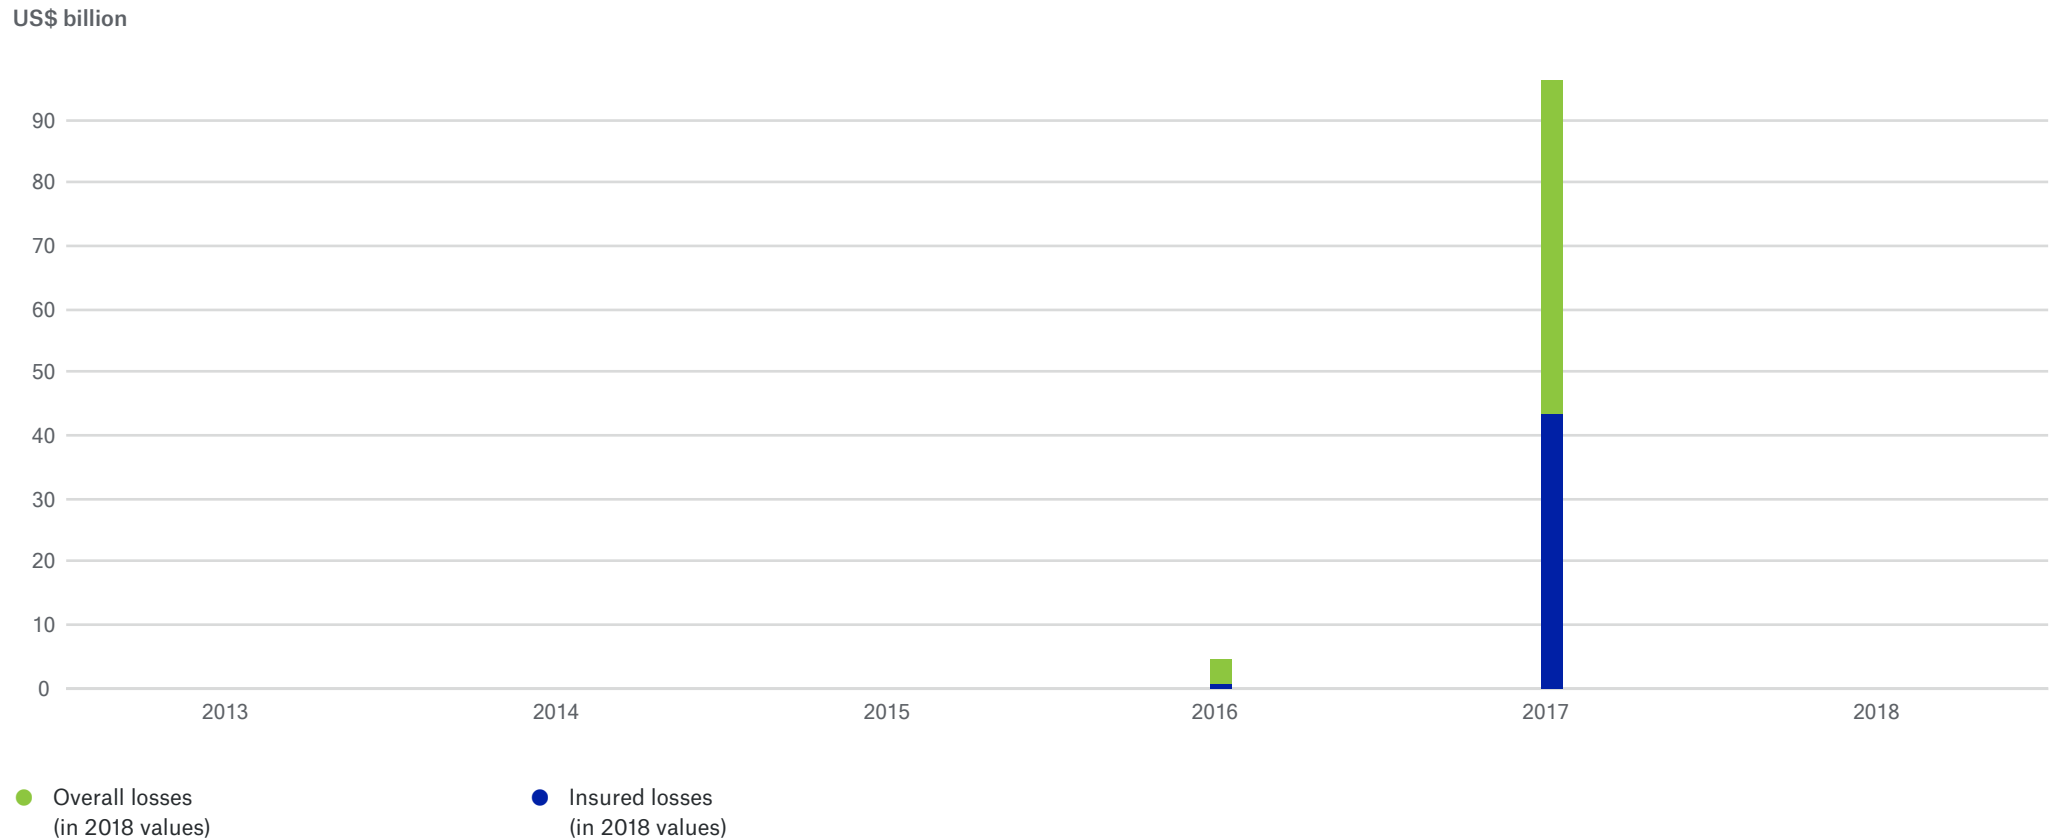

Inflation adjusted via country-specific consumer price index and consideration of exchange rate fluctuations between local currency and US\$.

## Overall and insured losses in US\$

Catastrophic tropical cyclone events  
in the Caribbean 2013 - 2018

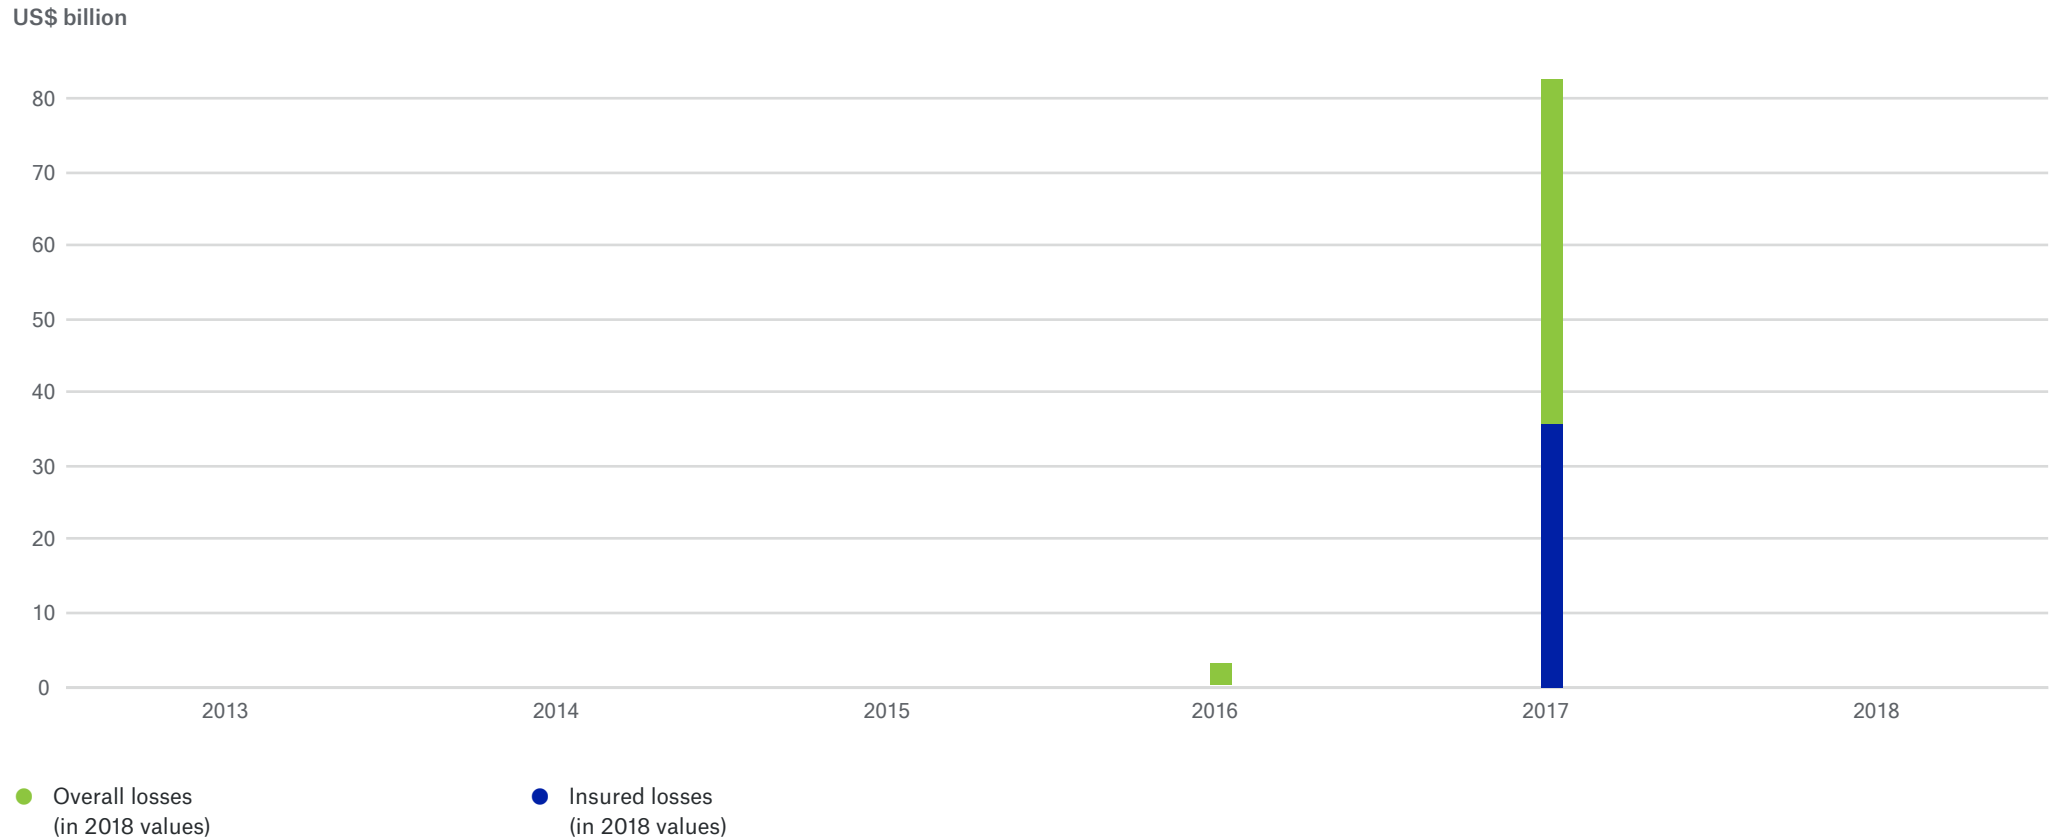

Inflation adjusted via country-specific consumer price index and consideration of exchange rate fluctuations between local currency and US\$.

## Overall losses in US\$: nominal, inflation adjusted, and normalised

Relevant tropical cyclone events  
in the Caribbean 2013 – 2018

US\$ billion

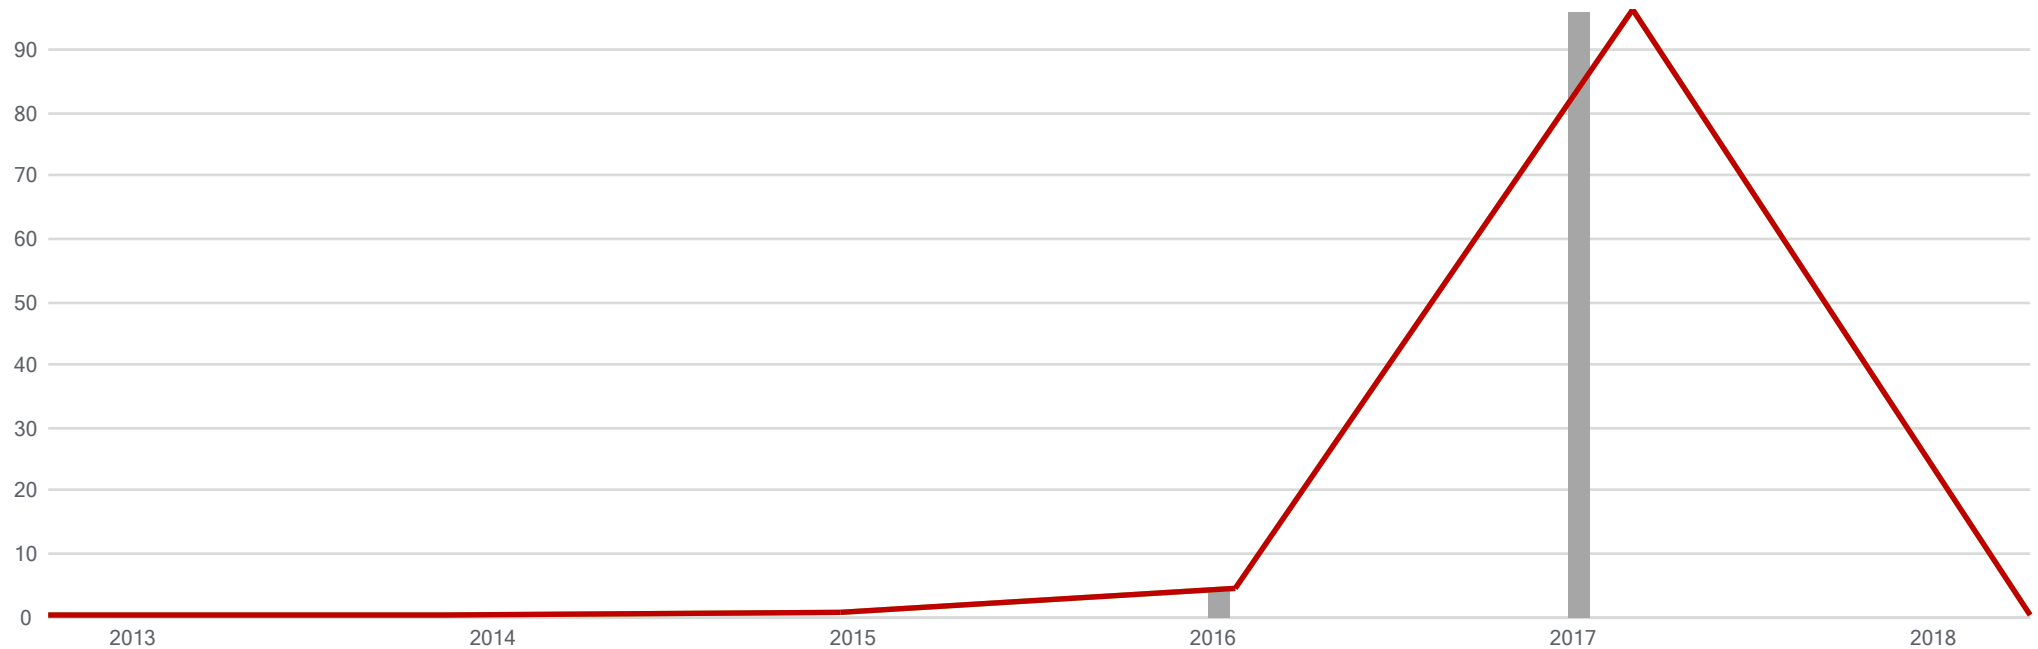

● Nominal overall losses

● Inflation adjusted overall losses  
(in 2018 values)

● Normalised overall losses  
(in 2018 values)

Inflation adjusted via country-specific consumer price index and consideration of exchange rate fluctuations between local currency and US\$.  
Normalization via local GDP developments measured in US\$.

# Overall losses in US\$: nominal, inflation adjusted, and normalised

Catastrophic tropical cyclone events  
in the Caribbean 2013 - 2018

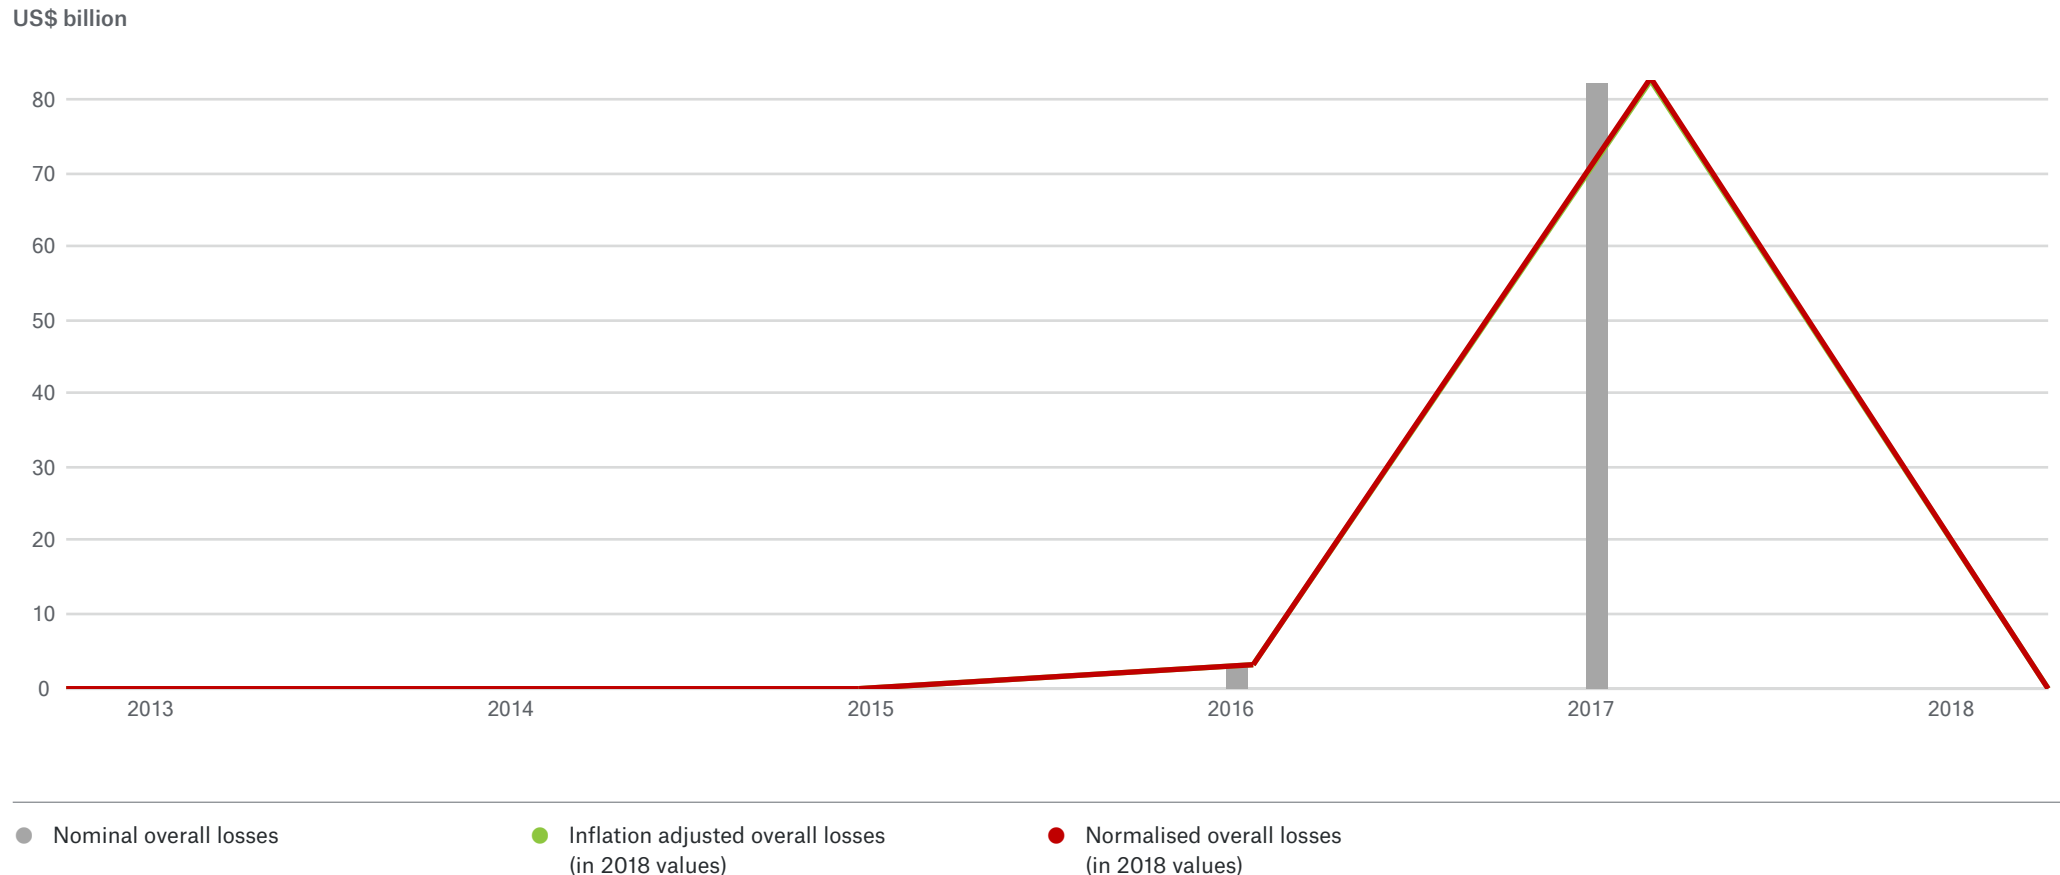

Inflation adjusted via country-specific consumer price index and consideration of exchange rate fluctuations between local currency and US\$.  
Normalization via local GDP developments measured in US\$.

## Percentage distribution by event family

Relevant tropical cyclone events  
in the Caribbean 2013 - 2018

Number of events:  
**10**

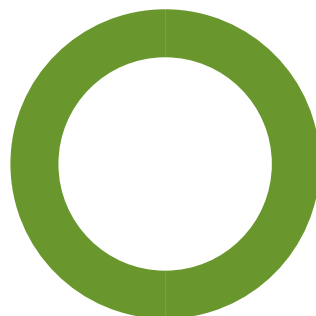

● 100.0%

Overall losses:  
**US\$ 101bn**

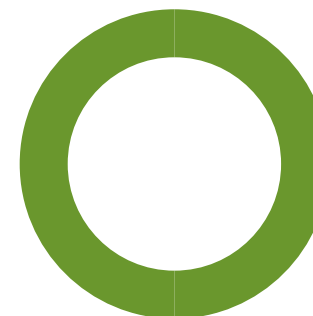

● 100.0%

Fatalities : **3,698**

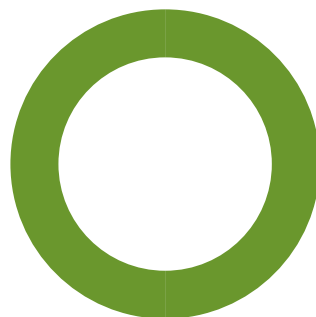

● 100.0%

Insured losses :  
**US\$ 44bn**

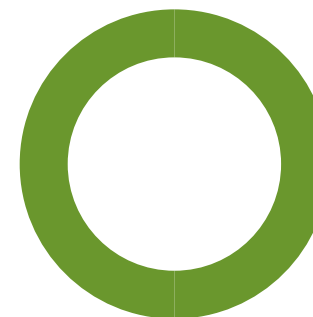

● 100.0%

- Meteorological events  
(Tropical cyclone, extratropical storm,  
convective storm, local storm)

Accounted events have caused at least one fatality and/or produced normalised losses  $\geq$  US\$ 100k, 300k, 1m, or 3m (depending on the assigned World Bank income group of the affected country).

Inflation adjusted via country-specific consumer price index and consideration of exchange rate fluctuations between local currency and US\$.

## Percentage distribution by event family

Catastrophic tropical cyclone events  
in the Caribbean 2013 - 2018

Number of events:  
**3**



● 100.0%

Overall losses:  
**US\$ 86bn**

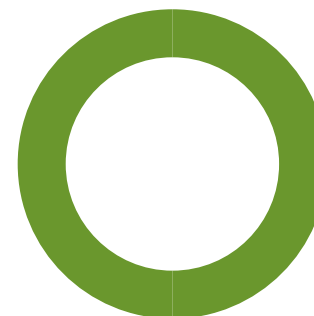

● 100.0%

Fatalities : **3,574**



● 100.0%

Insured losses :  
**US\$ 36bn**

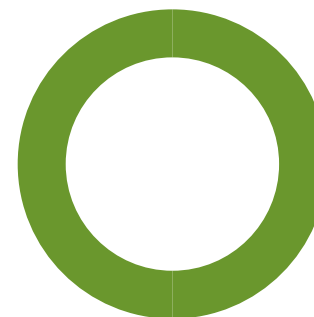

● 100.0%

- Meteorological events  
(Tropical cyclone, extratropical storm,  
convective storm, local storm)

Accounted events have caused  $\geq 1,000$  fatalities and/or produced normalised losses  $\geq$  US\$ 100m, 300m, 1bn, or 3bn (depending on the assigned World Bank income group of the affected country).

Inflation adjusted via country-specific consumer price index and consideration of exchange rate fluctuations between local currency and US\$.

## 5 costliest events ordered by nominal overall losses

### Relevant tropical cyclone events in the Caribbean 2013 – 2018

| Date                | Event                              | Affected Area                                                                                                                                                                                                                                                     | Overall losses<br>(US\$m, original values) | Insured losses<br>(US\$m, original values) | Fatalities |
|---------------------|------------------------------------|-------------------------------------------------------------------------------------------------------------------------------------------------------------------------------------------------------------------------------------------------------------------|--------------------------------------------|--------------------------------------------|------------|
| 19 - 22 Sep 2017    | Hurricane Maria, flood             | Puerto Rico, Virgin Islands, U.S., Dominica, Guadeloupe, Dominican Republic, Martinique, Haiti                                                                                                                                                                    | 68,600                                     | 29,900                                     | 3,019      |
| 6 - 14 Sep 2017     | Hurricane Irma, storm surge, flood | Virgin Islands, U.S., Virgin Islands, British, Cuba, Saint Martin, Sint Maarten, Saint Barthelemy, Anguilla, Puerto Rico, Turks and Caicos Islands, Antigua and Barbuda, Bahamas, Bonaire, Sint Eustatius, Saba, Dominican Republic, Haiti, Saint Kitts and Nevis | 27,600                                     | 13,400                                     | 48         |
| 28 Sep - 9 Oct 2016 | Hurricane Matthew, storm surge     | Cuba, Haiti, Bahamas, Dominican Republic, Saint Lucia, Saint Vincent and the Grenadines                                                                                                                                                                           | 4,200                                      | 620                                        | 551        |
| 25 - 31 Aug 2015    | Tropical Storm Erika, flash flood  | Dominica, Puerto Rico, Dominican Republic, Haiti                                                                                                                                                                                                                  | 440                                        |                                            | 36         |
| 1 - 7 Oct 2015      | Hurricane Joaquin, storm surge     | Bahamas, Haiti                                                                                                                                                                                                                                                    | 80                                         | 14                                         | 34         |

## 5 costliest events ordered by nominal insured losses

### Relevant tropical cyclone events in the Caribbean 2013 – 2018

| Date                | Event                              | Affected Area                                                                                                                                                                                                                                                     | Overall losses<br>(US\$m, original values) | Insured losses<br>(US\$m, original values) | Fatalities |
|---------------------|------------------------------------|-------------------------------------------------------------------------------------------------------------------------------------------------------------------------------------------------------------------------------------------------------------------|--------------------------------------------|--------------------------------------------|------------|
| 19 - 22 Sep 2017    | Hurricane Maria, flood             | Puerto Rico, Virgin Islands, U.S., Dominica, Guadeloupe, Dominican Republic, Martinique, Haiti                                                                                                                                                                    | 68,600                                     | 29,900                                     | 3,019      |
| 6 - 14 Sep 2017     | Hurricane Irma, storm surge, flood | Virgin Islands, U.S., Virgin Islands, British, Cuba, Saint Martin, Sint Maarten, Saint Barthelemy, Anguilla, Puerto Rico, Turks and Caicos Islands, Antigua and Barbuda, Bahamas, Bonaire, Sint Eustatius, Saba, Dominican Republic, Haiti, Saint Kitts and Nevis | 27,600                                     | 13,400                                     | 48         |
| 28 Sep - 9 Oct 2016 | Hurricane Matthew, storm surge     | Cuba, Haiti, Bahamas, Dominican Republic, Saint Lucia, Saint Vincent and the Grenadines                                                                                                                                                                           | 4,200                                      | 620                                        | 551        |
| 1 - 7 Oct 2015      | Hurricane Joaquin, storm surge     | Bahamas, Haiti                                                                                                                                                                                                                                                    | 80                                         | 14                                         | 34         |

## 5 deadliest events

### Relevant tropical cyclone events in the Caribbean 2013 – 2018

| Date                | Event                              | Affected Area                                                                                                                                                                                                                                                     | Overall losses<br>(US\$m, original values) | Insured losses<br>(US\$m, original values) | Fatalities |
|---------------------|------------------------------------|-------------------------------------------------------------------------------------------------------------------------------------------------------------------------------------------------------------------------------------------------------------------|--------------------------------------------|--------------------------------------------|------------|
| 19 - 22 Sep 2017    | Hurricane Maria, flood             | Puerto Rico, Virgin Islands, U.S., Dominica, Guadeloupe, Dominican Republic, Martinique, Haiti                                                                                                                                                                    | 68,600                                     | 29,900                                     | 3,019      |
| 28 Sep - 9 Oct 2016 | Hurricane Matthew, storm surge     | Cuba, Haiti, Bahamas, Dominican Republic, Saint Lucia, Saint Vincent and the Grenadines                                                                                                                                                                           | 4,200                                      | 620                                        | 551        |
| 6 - 14 Sep 2017     | Hurricane Irma, storm surge, flood | Virgin Islands, U.S., Virgin Islands, British, Cuba, Saint Martin, Sint Maarten, Saint Barthelemy, Anguilla, Puerto Rico, Turks and Caicos Islands, Antigua and Barbuda, Bahamas, Bonaire, Sint Eustatius, Saba, Dominican Republic, Haiti, Saint Kitts and Nevis | 27,600                                     | 13,400                                     | 48         |
| 25 - 31 Aug 2015    | Tropical Storm Erika, flash flood  | Dominica, Puerto Rico, Dominican Republic, Haiti                                                                                                                                                                                                                  | 440                                        |                                            | 36         |
| 1 - 7 Oct 2015      | Hurricane Joaquin, storm surge     | Bahamas, Haiti                                                                                                                                                                                                                                                    | 80                                         | 14                                         | 34         |

## 5 costliest events ordered by inflation adjusted overall losses

### Relevant tropical cyclone events in the Caribbean 2013 – 2018

| Date                | Event                              | Affected Area                                                                                                                                                                                                                                                     | Overall losses<br>(US\$m, in 2018 values) | Insured losses<br>(US\$m, in 2018 values) | Fatalities |
|---------------------|------------------------------------|-------------------------------------------------------------------------------------------------------------------------------------------------------------------------------------------------------------------------------------------------------------------|-------------------------------------------|-------------------------------------------|------------|
| 19 - 22 Sep 2017    | Hurricane Maria, flood             | Puerto Rico, Virgin Islands, U.S., Dominica, Guadeloupe, Dominican Republic, Martinique, Haiti                                                                                                                                                                    | 68,600                                    | 29,900                                    | 3,019      |
| 6 - 14 Sep 2017     | Hurricane Irma, storm surge, flood | Virgin Islands, U.S., Virgin Islands, British, Cuba, Saint Martin, Sint Maarten, Saint Barthelemy, Anguilla, Puerto Rico, Turks and Caicos Islands, Antigua and Barbuda, Bahamas, Bonaire, Sint Eustatius, Saba, Dominican Republic, Haiti, Saint Kitts and Nevis | 27,600                                    | 13,400                                    | 48         |
| 28 Sep - 9 Oct 2016 | Hurricane Matthew, storm surge     | Cuba, Haiti, Bahamas, Dominican Republic, Saint Lucia, Saint Vincent and the Grenadines                                                                                                                                                                           | 4,400                                     | 630                                       | 551        |
| 25 - 31 Aug 2015    | Tropical Storm Erika, flash flood  | Dominica, Puerto Rico, Dominican Republic, Haiti                                                                                                                                                                                                                  | 450                                       |                                           | 36         |
| 1 - 7 Oct 2015      | Hurricane Joaquin, storm surge     | Bahamas, Haiti                                                                                                                                                                                                                                                    | 81                                        | 14                                        | 34         |

## 5 costliest events ordered by inflation adjusted insured losses

### Relevant tropical cyclone events in the Caribbean 2013 – 2018

| Date                | Event                              | Affected Area                                                                                                                                                                                                                                                     | Overall losses<br>(US\$m, in 2018 values) | Insured losses<br>(US\$m, in 2018 values) | Fatalities |
|---------------------|------------------------------------|-------------------------------------------------------------------------------------------------------------------------------------------------------------------------------------------------------------------------------------------------------------------|-------------------------------------------|-------------------------------------------|------------|
| 19 - 22 Sep 2017    | Hurricane Maria, flood             | Puerto Rico, Virgin Islands, U.S., Dominica, Guadeloupe, Dominican Republic, Martinique, Haiti                                                                                                                                                                    | 68,600                                    | 29,900                                    | 3,019      |
| 6 - 14 Sep 2017     | Hurricane Irma, storm surge, flood | Virgin Islands, U.S., Virgin Islands, British, Cuba, Saint Martin, Sint Maarten, Saint Barthelemy, Anguilla, Puerto Rico, Turks and Caicos Islands, Antigua and Barbuda, Bahamas, Bonaire, Sint Eustatius, Saba, Dominican Republic, Haiti, Saint Kitts and Nevis | 27,600                                    | 13,400                                    | 48         |
| 28 Sep - 9 Oct 2016 | Hurricane Matthew, storm surge     | Cuba, Haiti, Bahamas, Dominican Republic, Saint Lucia, Saint Vincent and the Grenadines                                                                                                                                                                           | 4,400                                     | 630                                       | 551        |
| 1 - 7 Oct 2015      | Hurricane Joaquin, storm surge     | Bahamas, Haiti                                                                                                                                                                                                                                                    | 81                                        | 14                                        | 34         |

## 5 costliest events ordered by normalised overall losses

### Relevant tropical cyclone events in the Caribbean 2013 – 2018

| Date                | Event                              | Affected Area                                                                                                                                                                                                                                                     | Overall losses<br>(US\$m, in 2018 values) | Fatalities |
|---------------------|------------------------------------|-------------------------------------------------------------------------------------------------------------------------------------------------------------------------------------------------------------------------------------------------------------------|-------------------------------------------|------------|
| 19 - 22 Sep 2017    | Hurricane Maria, flood             | Puerto Rico, Virgin Islands, U.S., Dominica, Guadeloupe, Dominican Republic, Martinique, Haiti                                                                                                                                                                    | 68,600                                    | 3,019      |
| 6 - 14 Sep 2017     | Hurricane Irma, storm surge, flood | Virgin Islands, U.S., Virgin Islands, British, Cuba, Saint Martin, Sint Maarten, Saint Barthelemy, Anguilla, Puerto Rico, Turks and Caicos Islands, Antigua and Barbuda, Bahamas, Bonaire, Sint Eustatius, Saba, Dominican Republic, Haiti, Saint Kitts and Nevis | 27,800                                    | 48         |
| 28 Sep - 9 Oct 2016 | Hurricane Matthew, storm surge     | Cuba, Haiti, Bahamas, Dominican Republic, Saint Lucia, Saint Vincent and the Grenadines                                                                                                                                                                           | 4,400                                     | 551        |
| 25 - 31 Aug 2015    | Tropical Storm Erika, flash flood  | Dominica, Puerto Rico, Dominican Republic, Haiti                                                                                                                                                                                                                  | 460                                       | 36         |
| 1 - 7 Oct 2015      | Hurricane Joaquin, storm surge     | Bahamas, Haiti                                                                                                                                                                                                                                                    | 83                                        | 34         |

## Explanation for the interpretation of loss data statistics

### Number statistics and loss thresholds

Number statistics are influenced by a constantly improved reporting of small-scale loss events over the time (*reporting bias*). There is a need to distinguish between **registered** and **relevant** loss events.

- **Registered loss events** are all events recorded by NatCatSERVICE. The range extends from *insignificant* to *catastrophic* loss events expressed in overall losses and / or fatalities. The reporting bias is particularly high for high frequency and low impact events.
- **Relevant loss events** exceed defined thresholds of *normalised* overall losses and/or fatalities. These events are considered in number statistics and trend analyses. Threshold values are:
  - Fatalities  $\geq 1$
  - Normalized overall loss  $\geq$  US\$ 100k, 300k, 1m, or 3m (depending on assigned World Bank income group of each affected country)
- **Type of data filtering is helpful for** reduction/elimination of reporting bias and for conclusions on changes in frequency of occurred loss events.

# Explanation for the interpretation of loss data statistics

## Inflation adjustment and normalization of NatCat loss data

### Three ways of presenting loss data:

- Nominal losses: values as they originally occurred
- Inflation adjusted losses: accounting for changes in monetary equivalent
- Normalized losses: accounting for growth of values and assets

### Inflation adjustment:

- Loss value in local currency is *adjusted to inflation* via the country's consumer price index (CPI) under consideration of exchange rate fluctuations between the local currency and the US\$.

### Normalization:

- Loss value in US\$ is *normalized* via the development of locally resolved (1° x 1°) nominal gross domestic product data in US\$ between year of occurrence and today.

### Inflation adjusted loss data is helpful for...

- How high would a historic loss value be in today's money?

### Normalized loss data is helpful for...

- What losses would a historic event cause when exposing today's values and assets?
- Conclusions on loss drivers like changes on the hazard side or effectivity of prevention measures

© 2018 Münchener Rückversicherungs-Gesellschaft Aktiengesellschaft in München (“Munich Re”). All rights reserved.

The content of this presentation (including, without limitation, text, pictures, graphics, as well as the arrangement thereof) is protected under copyright law and other protective legislation. These materials or any portions thereof may be used solely for personal and non-commercial purposes. Any other use requires Munich Re’s prior written approval.

Munich Re has used its discretion, best judgement and every reasonable effort in compiling the information and components contained in this presentation. It may not be held liable, however, for the completeness, correctness, topicality and technical accuracy of any information contained herein. Munich Re assumes no liability with regard to updating the information or other content provided in this presentation or to adapting this to conform with future events or developments.
